# Supplementary material for: A novel bicyclic 2,4-diaminopyrimidine inhibitor of Streptococcus suis dihydrofolate reductase
Source: PeerJ. 2021 Feb 3;9:e10743. doi: 10.7717/peerj.10743 (PMC7866885; doi:10.7717/peerj.10743)
Supplement: Data S1 [file peerj-09-10743-s003.xlsx]

## Sheet: 1B
OD600			Expt 1				Expt 2				Expt 3
			date 5/7/17	OD600			date 6/7/17	OD600			date 7/7/17	OD600
	E. coli	Replicate	1	2	3	AVE1	1	2	3	AVE2	1	2	3	AVE3
Untreated	PA414	SsDHFR, EcThyA	0.3176	0.3507	0.3473	0.338533	0.30017	0.30317	0.31097	0.30477	0.28855	0.26825	0.27765	0.27815
TMP	PA414	SsDHFR, EcThyA	0.0872	0.1557	0.081	0.107967	0.05467	0.05987	0.05877	0.05777	0.01685	0.01775	0.02815	0.0209167
MMV675968	PA414	SsDHFR, EcThyA	0.0478			0.0478	0.01837			0.01837	0			0
Percent growth			Expt 1				Expt 2				Expt 3
			date 5/7/17				date 6/7/17				date 7/7/17
	E. coli	Replicate	1	2	3	AVE1	1	2	3	AVE2	1	2	3	AVE3	AVE123
Untreated	PA414	SsDHFR, EcThyA	93.8165	103.594	102.59	100	98.4907	99.475	102.034	100	103.739	96.4408	99.8202	100	100
TMP	PA414	SsDHFR, EcThyA	25.7582	45.9925	23.9267	31.8925	17.9381	19.6443	19.2834	18.9553	6.05788	6.38145	10.1204	7.51992	19.4559
MMV675968	PA414	SsDHFR, EcThyA	14.1197			14.1197	6.0275			6.0275	0			0	6.71574

## Sheet: 1C
Species	E. coli PA414 + EcTS + SsDHFR			Expt 1						Expt 2									Expt 3
				Date	18/10/2019					Expt date	2019-10-19								Expt date	22/10/2019
			OD600				Percent growth				OD600				relative				OD600			relative
MMV675968 (uM)	thymidine (ug/ml)	1	2	3	ave	1	2	3	ave	1	2	3	ave	1	2	3	ave	1	2	3	ave	1	2	3	ave
0	0	0.360267	0.327867	0.327167	0.338433	106.451	96.8778	96.6709	100	0.3411	0.3157	0.3294	0.328733	103.762	96.0353	100.203	100	0.3325	0.3254	0.3255	0.3278	101.434	99.2678	99.2984	100
10	0	0.0331667	0.0326667	0.0386667	0.0348333	9.80006	9.65232	11.4252	10.2925	0.1008	0.0469	0.0425	0.0634	30.6632	14.2669	12.9284	19.2861	0.0678	0.0712	0.0888		20.6833	21.7206	27.0897	23.1645
0	50	0.336267	0.267067	0.256267	0.286533	99.3598	78.9126	75.7215	84.6646	0.3217	0.2469	0.2437	0.270767	97.8605	75.1065	74.133	82.3667	0.3171	0.2471	0.2762		96.7358	75.3813	84.2587	85.4586
10	50	0.411167	0.275767	0.290867	0.325933	121.491	81.4833	85.945	96.3065	0.3237	0.2526	0.2669	0.281067	98.4689	76.8404	81.1904	85.4999	0.2878	0.2252	0.2455		87.7974	68.7004	74.8932	77.1304

## Sheet: 1D
Percent SsDHFR activtiy	p	SsDHFR	1000 nM MMV675968
		100	3
		100	2
	1	100	2
	2	100
	2	100
	Expt. Date		2019-04-24		2019-04-25		2019-04-26		2019-04-29		2019-04-30
	Expt		1		2		3		4		5
		OD reduction/min	percent	OD reduction /min	percent	OD reduction/min	percent	OD reduction/min	percent	OD/min	percent
	p					0.00077316	1.25805	0.002752	2.13234	0.0021072	1.79214
	SsDHFR	0.081622	100	0.075459	100	0.061457	100	0.12906	100	0.11758	100
	MMV675968	0.0022513	2.7582	0.0018145	2.40462	0.0013634	2.21846

## Sheet: 1E
Species	S. suis P1/7 and S. suis HE06
			Expt 1								Expt 2								Expt 3								Expt 4
S. suis P1/7			OD600				Percent growth				OD600				Percent growth				OD600				Percent growth				OD600				Percent growth
MMV675968 (µM)	Thymidine (µg/ml)	1	2	3	AVE	1	2	3	AVE	1	2	3	AVE	1	2	3	AVE	1	2	3	AVE	1	2	3	AVE	1	2	3	AVE	1	2	3	AVE
0	0	0.120595	0.146822	0.119846	0.129088	93.4214	113.738	92.8406	100	0.161107	0.122431	0.129155	0.137564	117.114	88.9991	93.8867	100	0.152769	0.153074	0.124415	0.143419	106.519	106.731	86.7494	100	0.133713	0.135526	0.123669	0.130969	102.095	103.479	94.4259	100
0	10	0.121732	0.129463	0.123834	0.12501	94.3019	100.291	95.9299	96.841	0.13114	0.100057	0.114995	0.115397	95.3298	72.7348	83.5933	83.886	0.138312	0.11681	0.133517	0.129547	96.4388	81.4466	93.0958	90.3271	0.127966	0.120291	0.126172	0.12481	97.7069	91.8467	96.3374	95.297
1	0	-0.0180851	0.0072931	-0.0152376	-0.00867653	0	5.64973	0	1.88324		-0.014666	-0.00601337	-0.0103397		0	0	0		-0.0156961	0.00630014	-0.00469795		0	4.39281	2.19641		-0.0116454	0.00177622	-0.0049346		0	1.35621	0.678106
1	10	0.11589	0.0999053	0.0950777	0.103624	89.7759	77.3934	73.6536	80.2743	0.0654563	0.0929065	0.0943179	0.0842269	47.5823	67.5367	68.5628	61.2273	0.100612	0.0981076	0.0948917	0.0978706	70.1526	68.4061	66.1637	68.2408	0.103651	0.114271	0.0988989	0.105607	79.1416	87.2502	75.5131	80.635
				Expt1							Expt 2								Expt 3								Expt 4
S. suis HE06			OD600				Percent growth				OD600				Percent growth				OD600				Percent growth				OD600				Percent growth
MMV675968 (µM)	Thymidine (µg/ml)	1	2	3	AVE	1	2	3	AVE	1	2	3	AVE	1	2	3	AVE	1	2	3	AVE	1	2	3	AVE	1	2	3	AVE	1	2	3	AVE
0	0	0.13642	0.125346	0.134854	0.132207	103.187	94.8108	102.003	100	0.138434	0.138463	0.118464	0.131787	105.043	105.066	89.8907	100	0.196944	0.228698	0.20408	0.209907	93.8244	108.952	97.2238	100	0.210067	0.38885	0.20945	0.269456	77.9597	144.309	77.7309	100
0	10	0.138501	0.139484	0.136095	0.138027	104.761	105.504	102.941	104.402	0.111106	0.107519	0.141569	0.120065	84.3074	81.5856	107.422	91.1051	0.186221	0.165511	0.187244	0.179658	88.7161	78.8495	89.203	85.5895	0.160502	0.168604	0.196216	0.175107	59.5653	62.572	72.8194	64.9855
1	0	0.0125779	0.00685237	0.00677824	0.00873618	9.51385	5.18307	5.127	6.60798	-0.00845896	-0.00272853	-0.00202155	-0.00440301	0	0	0	0	0.00895954		0.00384359	0.00640156	4.26834		1.83109	3.04971	-0.00956338	0.0100801	0.00346819	0.0013283	0	3.74091	1.28711	2
1	10	0.101333	0.10369	0.122709	0.109244	76.6472	78.43	92.8157	82.631	0.0918879	0.0988503	0.105996	0.0989116	69.7245	75.0076	80.4301	75.054	0.101163	0.10382	0.120145	0.108376	48.1943	49.4598	57.2372	51.6304	0.130652	0.153124	0.161265	0.148347	48.4873	56.8272	59.8483	55.0543
				Ss P1/7					Ss HE06
Condition				Percent growth					Percent growth
MMV675968 (µM)	thymidine (µg/mL)	replicate	1	2	3	4	AVE	1	2	3	4	AVE
0	0		100	100	100	100	100	100	100	100	100	100
0	10		97	84	90	95	91.5	104	91	86	65	86.5
1	0		2	0	2	1	1.25	7	0	3	2	3
1	10		80	61	68	81	72.5	83	75	52	55	66.25

## Sheet: 2B
dmso	PMX	MMV667486	MMV667487	TMP	Pyr	cyloguanil	MTX	MMV675968
100	98	76	112	23	19	36	2	3
100	140	111	142	13	17	30	3	2
100	114	93	18	9	14	22	0	2
Expt. Date			2019-04-24		2019-04-25		2019-04-26
rep			1		2		3
	SsDHFR + 1000 nM inhibitors
	inhibitor	conc (nM)	OD reduction/min	percent	OD reduction/min	percent	OD reduction/min	percent
	dmso		0.081622	100	0.075459	100	0.061457	100
	PMX	1000	0.079669	97.6073	0.10587	140.301	0.070176	114.187
	MMV667486	1000	0.06191	75.8496	0.083714	110.94	0.056992	92.7348
	MMV667487	1000	0.091712	112.362	0.10709	141.918	0.011082	18.0321
	TMP	1000	0.018654	22.8541	0.0098001	12.9873	0.0053595	8.72073
	Pyr	1000	0.015288	18.7302	0.013057	17.3034	0.0086958	14.1494
	cyloguanil	1000	0.029367	35.9793	0.022697	30.0786	0.013285	21.6167
	MTX	1000	0.0015576	1.90831	0.0022489	2.98029	7.112e-05	0.115723
	MMV675968	1000	0.0022513	2.7582	0.0018145	2.40462	0.0013634	2.21846

## Sheet: 2C
	10 uM inhibitor		Ss P1/7				Ss HE06
	expt	1	2	3	AVE	1	2	3	AVE
	untreated	100	100	100	100	100	100	100	100
	PMX	54	126	62	80.6667	108	103	100	103.667
	MMV667486	82	102	66	83.3333	84	96	95	91.6667
	MMV667487	94	133	57	94.6667	90	114	100	101.333
	TMP	2	3	2	2.33333	0	0	1	0.333333
	PYR	11	10	14	11.6667	6	7	65	26
	Cycloguanil	0	1	0	0.333333	2	3	4	3
	MTX	2	3	4	3	0	0	0	0
	MMV675968	0	0	0	0	2	2	1	1.66667
	date	2017-08-31		2017-09-06		2017-09-07			Date	2017-08-31		2017-09-06		2017-09-07
	Ss P1/7	OD600	Percent	OD600	Percent	OD600	Percent		Ss HE06	OD600	Percent	OD600	Percent	OD600	Percent
	Expt	1	1	2	2	3	3		Expt	1	1	2	2	3	3
	untreated	0.31199	100	0.40703	100	0.316936	100		untreated	0.440981	100	0.491402	100	0.509268	100
	PMX	0.167271	54	0.513516	126.162	0.196494	61.9982		PMX	0.474822	107.674	0.505355	102.839	0.510334	100.209
	MMV667486	0.255145	82	0.413526	101.596	0.209749	66.1802		MMV667486	0.369473	83.7843	0.470953	95.8387	0.484485	95.1335
	MMV667487	0.294778	94	0.539672	132.588	0.18065	56.999		MMV667487	0.398298	90.3209	0.560853	114.133	0.510275	100.198
	TMP	0.00699118	2	0.0120651	2.96418	0.00546402	1.72402		TMP	0.000808334	0.183304	0	-0.063337	0.00324869	0.637913
	PYR	0.034872	11	0.0422146	10.3714	0.0441007	13.9147		PYR	0.0278614	6.31805	0.0327766	6.67003	0.332244	65.2396
	Cycloguanil	0	0	0.0026249	0.644892	0	0		Cycloguanil	0.00820941	1.86162	0.0162793	3.31284	0.0193042	3.79057
	MTX	0.00656026	2	0.0142155	3.49251	0.0114961	3.62726		MTX	0	-0.304236	0	-0.0231451	0	-0.322823
	MMV675968	0	0	0	-0.0826656	0	0		MMV675968	0.00874703	1.98354	0.011655	2.37179	0.00435082	0.854329

## Sheet: 2D
1 uM inhibitor
	Combined 3 expt		2017-09-13
			2017-09-15
			2017-09-20
	Antifolates	1 µM
			OD600					percent growth
	Date	2017-09-13	2017-09-15	2017-09-20			2017-09-13	2017-09-15	2017-09-20
	Ss P1/7	1	2	3	AVE	SD	1	2	3	AVE	SD
	untreated	0.315305	0.250807	0.246029	0.270714	0.038691	100	100	100	100	0
	TMP	0.322194	0.296868	0.295397	0.30482	0.0150645	102.185	118.365	120.066	113.539	9.86933
	Pyr	0.374796	0.329915	0.336045	0.346919	0.0243363	118.868	131.541	136.587	128.999	9.12929
	Cycloguanil	0.31203	0.269606	0.283741	0.288459	0.0216021	98.9614	107.495	115.328	107.262	8.18578
	MTX	0	0.0127049	0.000144898	0.00428326	0.00926987	0	5.06559	0.0588944	1.70816	3.51352
	MMV675968	0.000343767	0	0	0.000114589	0.00746319	0.109027	0	0	0.0363422	3.02207
	Ss HE06	1	2	3	AVE	SD	1	2	3	AVE	SD
	untreated	0.442882	0.397	0.40058	0.413487	0.0255192	100	100	100	100	0
	TMP	0.460803	0.424768	0.416471	0.434014	0.0235681	104.047	106.994	103.967	105.003	1.72532
	Pyr	0.450126	0.430002	0.40968	0.429936	0.0202232	101.636	108.313	102.272	104.073	3.6853
	Cycloguanil	0.48147	0.466072	0.478661	0.475401	0.00820028	108.713	117.399	119.492	115.201	5.71563
	MTX	0	0	0	0	0.00155112	-0.304109	0	-0.265783	-0.189964	0.400388
	MMV675968	0.0121783	0.0051239	0.00913816	0.00881344	0.00353837	2.74978	1.29066	2.28123	2.10722	0.744961
