# Supplementary material for: A novel bicyclic 2,4-diaminopyrimidine inhibitor of Streptococcus suis dihydrofolate reductase
Source: PeerJ journal article supplement (doi:10.7717/peerj.10743), 2021-02-03
Supplement: FigS1.pdf [file FigS1.pdf]

**A.**

SsP17DHFR ATGACTAAAAAGATTGTTGCCATTTGGGCTCAAGATGAAAATGGATTGATTGGAAAAGGT 60  
SsHE06DHFR ATGACTAAAAAGATTGTTGCCATTTGGGCTCAAGATGAAAATGGATTGATTGGAAAAGGT 60  
\*\*\*\*\*

SsP17DHFR GATAGACTTCCTTGGTCATTGCCAGCTGACTTAGCTCATTTCAAAAAACGACAACAGGT 120  
SsHE06DHFR GATAGACTTCCTTGGTCATTGCCAGCTGACTTAGCTCATTTCAAAAAACGACAACAGGT 120  
\*\*\*\*\*

SsP17DHFR CACACGATGGTGATGGGACGTATAACTTTCGACGGCATGGGTAACCTGCTCTTCCCAAT 180  
SsHE06DHFR CACACGATGGTGATGGGACGTATAACTTTCGACGGCATGGGTAACCTGCTCTTCCCAAT 180  
\*\*\*\*\*

SsP17DHFR CGTCACACCATCGTTTTGACAACGGATAAAACCTATCAACTAGAGAGTGAACGTATTACC 240  
SsHE06DHFR CGTCACACCATCGTTTTGACAACGGATAAAACCTATCAACTAGAGAGTGAACGTATTACC 240  
\*\*\*\*\*

SsP17DHFR ATTTTACACAGTGTGGAAGATGTTCTAGATTGGTATAACAAACAGGAGCAGACACTATTT 300  
SsHE06DHFR ATTTTACACAGTGTGGAAGATGTTCTAGATTGGTATAACAAACAGGAGCAGACACTATTT 300  
\*\*\*\*\*

SsP17DHFR GTGATTGGTGGGGACAAATTTTACTGCTTTTGCACCTTACATTGAAACATTAATAGTG 360  
SsHE06DHFR GTGATTGGTGGGGACAAATTTTACTGCTTTTGCACCTTACATTGAAACATTAATAGTG 360  
\*\*\*\*\*

SsP17DHFR ACAGATATTCACGGTCAATTTAATGGCGATGTGTATTTCCGAAAGCATTTCTATGGAG 420  
SsHE06DHFR ACAGATATTCACGGTCAATTTAATGGCGATGTGTATTTCCGAAAGCATTTCTATGGAG 420  
\*\*\*\*\*

SsP17DHFR AAATTTACAGCTACAAAAGCGCCAATTTACGTCCAAAAGACGAGAAAAACCCGTA TGATTTT 480  
SsHE06DHFR AAATTTACAGCTACAAAAGCGCCAATTTACGTCCAAAAGACGAGAAAAACCCGTA TGATTTT 480  
\*\*\*\*\*

SsP17DHFR ACAATAAAAACCTATGAAAGAAGAGATGGTTAG 513  
SsHE06DHFR ACAATAAAAACCTATGAAAGAAGAGATGGTTAG 513  
\*\*\*\*\*

**B.**

Folate binding - red  
NADPH binding - blue

SsP17DHFR MTKKIVAIWAQDENGLIGKGDRLPWSLPADLAHFKKTTTGHTMVMGRITFDGMGKRALPN 60  
SsHE06DHFR MTKKIVAIWAQDENGLIGKGDRLPWSLPADLAHFKKTTTGHTMVMGRITFDGMGKRALPN 60  
\*\*\*\*\*

SsP17DHFR RHTIVLTTDKTYQLESERITILHSVEDVLDWYNKQEQLFVIGGGQIFATAFAPYIETLIV 120  
SsHE06DHFR RHTIVLTTDKTYQLESERITILHSVEDVLDWYNKQEQLFVIGGGQIFATAFAPYIETLIV 120  
\*\*\*\*\*

SsP17DHFR TDIHQFNGDVYFPKAFPMEKFQLQSANLRPKDEKNPYDFTIKTYERRDG 170  
SsHE06DHFR TDIHQFNGDVYFPKAFPMEKFQLQSANLRPKDEKNPYDFTIKTYERRDG 170  
\*\*\*\*\*

**C.**

Folate binding - red  
NADPH binding - blue

SsDHFR MTKKIVAIWAQDENGLIGKGDRLPWSLPADLAHFKKTTTGHTMVMGRITFDGMGKRALPN 60  
SpDHFR MTKKIVAIWAQDEEGVIGKDNRLPWHLPALQHFKEITLNHAILMGRVTFDGMGRRLLPK 60  
\*\*\*\*\*:\*:\*\*\*.:\*\*\*\* \*\*:\* \*\*\*:\*\* .\*:::\*\*\*:\*\*\*\*\*:\* \*\*:

SsDHFR RHTIVLTTDKTYQLESERITILHSVEDVLDWYNKQEQLFVIGGGQIFATAFAPYIETLIV 120  
SpDHFR RETLILTRNPEEKI--DGVATFQDVQSVLDWYQAQEKPLYIIGGKQIFQAFEPYLDDEVIV 118  
\*.\*::\*\* : : : : :\*.\*.\*\*\*\*\*: \*\*:.\*:::\*\* \*\* \*\* \*\*\*: : :\*

SsDHFR TDIHQFNGDVYFPKAFPMEKFQLQSANLRPKDEKNPYDFTIKTYERRDG 170  
SpDHFR THIHARVEGDTYFPEELDSL FETVSSKPYAKDEKNPYDFTIQYRKRKEV 168  
\*.\*.:.:\*.\*\*\*: : . \* : \*:: \*\*\*\*\*: :\*::
