# Supplementary material for: A novel bicyclic 2,4-diaminopyrimidine inhibitor of Streptococcus suis dihydrofolate reductase
Source: PeerJ. 2021 Feb 3;9:e10743. doi: 10.7717/peerj.10743 (PMC7866885; doi:10.7717/peerj.10743)
Supplement: Table S1 — Hit compounds are highlighted in green. Reference compounds are highlighted in blue. Data are shown as mean ± SD from three independent experiments. Ss P1/7, S. suis P1/7 strain; Ss HE06, S. suis HE06 strain. [file peerj-09-10743-s001.xlsx]

## Sheet: Sheet1
Table S1. Percent growth of two S. suis strains after 18 hour incubation with 10 µM compounds compared with growth of untreated control (100%). Hit compounds are highlighted in green. Reference compounds are highlighted in blue. Data are shown as mean ± SD from three independent experiments. Ss P1/7, S. suis P1/7 strain; Ss HE06, S. suis HE06 strain.
Number	Rack	Position	Average Percent growth Ss P1/7	SD	Average Percent growth Ss HE06	SD	COMPOUND ID	DISEASE SET	TRIVIAL NAME	Total Molecular Weight	Molecular Weight Parent molecule	Molecular Formula	Salt name	Salt coefficient	cLogP	SMILES
1	PathogenBox_PlateA	A02	91.2282	15.7646	109.437	21.8786	MMV010764	MALARIA		320.437	320.437	C14H16N4OS2			2.5419	C(Nc1nn2c(cnc2s1)c3cccs3)C4CCOCC4
2	PathogenBox_PlateA	A03	77.4936	2.9299	75.1585	16.6245	MMV688472	TOXOPLASMOSIS		393.823	393.823	C21H16N3O3Cl			4.0012	CC(Oc1cccc(Cl)c1)C(=O)Nc1ccc2oc(nc2c1)-c1ccncc1
3	PathogenBox_PlateA	A04	129.073	42.3899	88.2501	12.0437	MMV688416	DENGUE		456.988	456.988	C23H25N4O2ClS			5.9284	CC(C)(C)OC(=O)N1CCN(CC1)c2nccc(n2)c3ccc(s3)c4ccc(Cl)cc4
4	PathogenBox_PlateA	A05	68.78	37.0605	59.7715	13.2966	MMV689758	REFERENCE COMPOUNDS	Bedaquiline	669.555	555.505	C32H31N2O2Br	Fumarate	1	7.1699	COc1nc2ccc(Br)cc2cc1[C@@H](c3ccccc3)[C@@](O)(CCN(C)C)c4cccc5ccccc45
5	PathogenBox_PlateA	A06	105.611	41.923	82.6975	14.8726	MMV688796	KINETOPLASTIDS		354.378	354.378	C19H19N4O2F			3.1351	Fc1ccc(cc1)c2oc(cc2)C(=O)NCc3nnc4CCCCCn34
6	PathogenBox_PlateA	A07	95.9504	30.7281	89.4264	3.43083	MMV676526	TUBERCULOSIS		385.816	385.816	C21H17NO3ClF			5.0331	COc1ccc(cc1)c2cc(NC(=O)c3ccc(F)cc3Cl)ccc2OC
7	PathogenBox_PlateA	A08	78.3203	6.32276	94.0329	5.6803	MMV688553	TUBERCULOSIS		343.377	343.377	C18H21N3O4			1.8108	O=C(NCc1cocc1)N2CCN(Cc3ccc4OCOc4c3)CC2
8	PathogenBox_PlateA	A09	3.25506	4.88718	1.06501	1.14054	MMV676501	TUBERCULOSIS		346.212	346.212	C11H5N3O2Cl2S2			4.5132	Clc1ccc(s1)C(=O)Nc2oc(nn2)c3ccc(Cl)s3
9	PathogenBox_PlateA	A10	102.549	40.9237	65.7213	21.7978	MMV676449	TUBERCULOSIS		344.835	344.835	C19H21N2O2Cl			3.6982	CCc1nc2ccccc2n1CC(O)COc3cc(C)ccc3Cl
10	PathogenBox_PlateA	A11	85.1852	18.7505	96.856	9.19598	MMV676412	TUBERCULOSIS		344.772	344.772	C16H9N2O3ClS			3.1732	Clc1ccc(cc1)S(=O)(=O)c2oc(nc2C#N)c3ccccc3
11	PathogenBox_PlateA	B02	87.0343	20.6521	111.05	21.7643	MMV1110498	WOLBACHIA LF		327.306	327.306	C15H16N3O2F3			2.3267	FC(F)(F)C1=C(C(N2CCCCC2)=O)N(C=CC=C3OC)C3=N1
12	PathogenBox_PlateA	B03	66.8406	51.5643	57.6624	21.7268	MMV000907	MALARIA		457.285	231.254	C11H13N5O	Trifluoroacetate	2	0.5722	COc1cccc2c(C)nc(N=C(N)N)nc12
13	PathogenBox_PlateA	B04	81.4827	17.5986	79.7501	10.1205	MMV688889	TUBERCULOSIS		349.817	349.817	C19H16N5Cl			3.4621	Clc1ccc(CCNc2cc(nc3ncnn23)c4ccccc4)cc1
14	PathogenBox_PlateA	B05	12.6939	22.1074	0.385585	8.73293	MMV688776	KINETOPLASTIDS		313.781	313.781	C17H16N3OCl			3.8977	Cc1nn2C(=O)C3=C(CCCC3)Nc2c1c4ccc(Cl)cc4
15	PathogenBox_PlateA	B06	91.3977	27.7639	82.6028	10.941	MMV688934	KINETOPLASTIDS	Tolfenpyrad	383.871	383.871	C21H22N3O2Cl			3.7918	CCc1nn(C)c(C(=O)NCc2ccc(Oc3ccc(C)cc3)cc2)c1Cl
16	PathogenBox_PlateA	B07	99.8525	45.4455	81.9315	4.74216	MMV676389	TUBERCULOSIS		368.43	368.43	C20H24N4O3			2.1312	O=C(N1CCN(Cc2ccc3OCOc3c2)CC1)c4[nH]nc5CCCCc45
17	PathogenBox_PlateA	B08	81.2201	23.6085	80.0941	1.55511	MMV676603	TUBERCULOSIS		431.386	431.386	C17H16N3O5F3S			1.2897	CC1COC2(CCN(CC2)C3=NC(=O)c4cc(cc(c4S3)[N+](=O)[O-])C(F)(F)F)O1
18	PathogenBox_PlateA	B09	89.0152	32.0514	77.9503	7.75852	MMV676401	TUBERCULOSIS		308.378	308.378	C18H20N4O			3.221	C(Nc1nc(nc2ccccc12)N3CCCCC3)c4occc4
19	PathogenBox_PlateA	B10	2.91262	3.89074	0	0	MMV102872	TUBERCULOSIS		367.714	367.714	C16H9N3O2ClF3			4.456	FC(F)(F)c1cccc(c1)C(=O)Nc2oc(nn2)c3ccc(Cl)cc3
20	PathogenBox_PlateA	B11	1.97439	3.79138	0.0799065	0.092268	MMV676477	TUBERCULOSIS		383.467	383.467	C19H21N5O2S			3.2764	CCC1=C(C)N=C(NC1=O)n2nc(C)cc2NC(=O)c3ccccc3SC
21	PathogenBox_PlateA	C02	83.0749	18.4753	82.2182	7.97634	MMV084603	MALARIA		377.51	377.51	C22H23N3OS			3.5308	O=C1N(Cc2cc3ccccc3s2)CC4CN(Cc5ccccc5)CCN14
22	PathogenBox_PlateA	C03	84.4973	20.5042	79.7105	12.4552	MMV688548	TOXOPLASMOSIS		267.329	267.329	C15H17N5			2.0496	CC(C)(C)n1nc(-c2ccccc2)c2c(N)ncnc12
23	PathogenBox_PlateA	C04	89.1405	28.5207	83.5529	3.72925	MMV688888	TUBERCULOSIS		349.405	349.405	C20H20N5F			2.7193	CN1CCN(CC1)c2cc(nc(n2)c3ccncc3)c4ccc(F)cc4
24	PathogenBox_PlateA	C05	16.3095	27.1249	2.58281	3.07931	MMV690028	KINETOPLASTIDS		546.661	546.661	C30H38N6O4			5.048	COC1=C(OCCCCOC2=CC=C(C3=NNN=N3)C=C2)C=C(C4=NN(C5CCCCCC5)C(C4(C)C)=O)C=C1
25	PathogenBox_PlateA	C06	82.9155	29.2489	76.9663	5.39568	MMV688943	KINETOPLASTIDS	Difenoconazol	406.263	406.263	C19H17N3O3Cl2			3.5513	CC1COC(Cn2cncn2)(O1)c3ccc(Oc4ccc(Cl)cc4)cc3Cl
26	PathogenBox_PlateA	C07	94.4386	34.794	91.4323	11.0078	MMV053220	TUBERCULOSIS		252.273	252.273	C15H12N2O2			1.8166	NC(=O)COc1ccc(cc1)c2ccc(cc2)C#N
27	PathogenBox_PlateA	C08	88.6176	13.5963	93.8184	5.15365	MMV676584	TUBERCULOSIS		314.786	314.786	C12H8N2OClFS2			2.9308	Fc1ccc2c(Cl)c(sc2c1)C(=O)NC3=NCCS3
28	PathogenBox_PlateA	C09	100.027	20.6537	93.6244	9.50423	MMV676439	TUBERCULOSIS		302.822	302.822	C16H15N2ClS			3.664	Cc1ccc2nc(Cl)c(CNCc3cccs3)cc2c1
29	PathogenBox_PlateA	C10	89.6723	26.6376	78.2618	3.73381	MMV676395	TUBERCULOSIS		307.303	307.303	C17H13N3O3			0.9946	OC1=C(C(=O)Nc2cccnc2)C(=O)N3CCc4cccc1c34
30	PathogenBox_PlateA	C11	81.8696	9.63096	57.6778	50.2242	MMV676379	TUBERCULOSIS		321.166	321.166	C15H13O3Br			3.2047	COc1cccc(OCC(=O)c2ccc(Br)cc2)c1
31	PathogenBox_PlateA	D02	49.6497	19.0009	59.6616	17.3804	MMV687762	KINETOPLASTIDS		320.385	320.385	C20H20N2O2			3.7258	C1CC(CCO1)c2cc(n[nH]2)c3ccc(Oc4ccccc4)cc3
32	PathogenBox_PlateA	D03	2.29281	3.71058	-0.0889076	1.3772	MMV1028806	MALARIA		339.392	339.392	C18H14N3OFS			3.9922	Fc1ccccc1C2CC2C(=O)Nc3nc(cs3)c4ccccn4
33	PathogenBox_PlateA	D04	43.7471	50.9016	46.682	37.2798	MMV661713	TUBERCULOSIS		435.334	435.334	C21H19N6Br			3.3044	Brc1cncc(c1)c2cc(NCCCn3ccnc3)nc(n2)c4ccccc4
34	PathogenBox_PlateA	D05	96.3434	38.6851	81.4283	10.5788	MMV688793	KINETOPLASTIDS		337.372	337.372	C19H19N3O3			3.0557	Cc1onc(C)c1COc2cccc(c2)C(=O)Nc3ncccc3C
35	PathogenBox_PlateA	D06	86.6425	28.7565	86.6881	8.53109	MMV688942	KINETOPLASTIDS	Bitertanol	337.416	337.416	C20H23N3O2			3.7417	CC(C)(C)C(O)C(Oc1ccc(cc1)c2ccccc2)n3cncn3
36	PathogenBox_PlateA	D07	115.269	71.4438	102.072	22.3908	MMV688554	TUBERCULOSIS		321.395	321.395	C15H19N3O3S			1.9636	CNc1snc(C)c1C(=O)NCCOc2ccc(OC)cc2
37	PathogenBox_PlateA	D08	85.4067	29.1749	80.0643	8.69282	MMV676555	TUBERCULOSIS		283.755	283.755	C16H14N3Cl			3.4446	Cc1nnc(NCc2cccc(Cl)c2)c3ccccc13
38	PathogenBox_PlateA	D09	9.42935	16.3321	0	0	MMV676383	TUBERCULOSIS		319.402	319.402	C14H13N3O2S2			3.7599	CCC(Sc1oc2ccccc2n1)C(=O)Nc3nccs3
39	PathogenBox_PlateA	D10	52.2225	38.2896	78.4903	7.2183	MMV676444	TUBERCULOSIS		345.436	345.436	C19H27N3O3			2.8137	O=C(NC1CCCCC1)N2CCN(Cc3ccc4OCOc4c3)CC2
40	PathogenBox_PlateA	D11	3.06854	5.31486	-0.0745137	0.086041	MMV676409	TUBERCULOSIS		329.349	329.349	C16H12N3O2FS			2.9484	Fc1cccc(OCC(=O)Nc2nc(cs2)c3ccccn3)c1
41	PathogenBox_PlateA	E02	105.869	55.324	85.2101	3.00934	MMV688514	KINETOPLASTIDS		263.294	263.294	C16H13N3O			2.2586	NC(=N)c1ccc(cc1)c2cc(on2)c3ccccc3
42	PathogenBox_PlateA	E03	77.4896	17.7033	80.7069	6.87492	MMV676350	MALARIA		345.846	345.846	C17H16N3OClS			3.526	Cc1cnc(CCNC(=O)c2cc(cs2)c3ccc(Cl)cc3)[nH]1
43	PathogenBox_PlateA	E04	88.2052	52.7373	67.6346	7.46075	MMV553002	TUBERCULOSIS		239.249	239.249	C10H9NO4S			-0.3113	CS(=O)(=O)CC1=Nc2ccccc2OC1=O
44	PathogenBox_PlateA	E05	120.235	87.3969	79.5448	6.93379	MMV688797	KINETOPLASTIDS		331.385	331.385	C18H22N3O2F			3.3262	CC1CCCCN1C(=O)NCCc2coc(n2)c3ccc(F)cc3
45	PathogenBox_PlateA	E06	2.20426	3.81789	3.43866	3.92467	MMV688756	TUBERCULOSIS	Sutezolid	353.412	353.412	C16H20N3O3FS			0.9272	CC(=O)NC[C@H]1CN(C(=O)O1)c2ccc(N3CCSCC3)c(F)c2
46	PathogenBox_PlateA	E07	5.08426	8.20173	0.166796	0.19702	MMV090930	TUBERCULOSIS		375.425	375.425	C16H13N3O4S2			2.8933	CCOC(=O)NC(=O)c1ccsc1NC(=O)c2nc3ccccc3s2
47	PathogenBox_PlateA	E08	95.7007	32.9806	96.3651	1.38935	MMV676431	TUBERCULOSIS		317.767	317.767	C17H16NO3Cl			3.7535	Cc1ccc(NC(=O)CC2COc3ccccc3O2)cc1Cl
48	PathogenBox_PlateA	E09	101.495	57.1403	82.9723	3.47134	MMV676571	TUBERCULOSIS		433.432	433.432	C24H20N3O4F			4.3386	COc1ccc(cc1OC)c2onc(n2)c3cccc(NC(=O)Cc4ccc(F)cc4)c3
49	PathogenBox_PlateA	E10	82.0997	38.1915	62.5976	7.63279	MMV676445	TUBERCULOSIS		281.352	281.352	C17H19N3O			2.7113	CCCn1c(CNc2ccccc2O)nc3ccccc13
50	PathogenBox_PlateA	E11	111.297	46.2005	93.8257	3.70712	MMV676589	TUBERCULOSIS		365.426	365.426	C21H23N3O3			4.31	O=C(CCC1CCCCC1)Nc2cccc(c2)c3oc(nn3)c4occc4
51	PathogenBox_PlateA	F02	52.8604	33.8842	68.6643	5.50045	MMV026020	MALARIA		420.487	420.487	C23H20N2O4S			3.239	CS(=O)(=O)c1cccc(c1)c2cnc3[nH]cc(c4ccc(CCC(=O)O)cc4)c3c2
52	PathogenBox_PlateA	F03	95.7938	44.9007	81.0537	11.2136	MMV688471	TOXOPLASMOSIS		343.379	343.379	C21H17N3O2			3.8866	CC(C(=O)Nc1ccc2oc(nc2c1)-c1ccncc1)c1ccccc1
53	PathogenBox_PlateA	F04	64.7107	46.5961	33.8069	18.8359	MMV676388	TUBERCULOSIS		330.362	330.362	C15H14N4O3S			1.2165	COc1cccc(c1)n2nnnc2S(=O)(=O)Cc3ccccc3
54	PathogenBox_PlateA	F05	102.965	40.849	93.7115	5.2307	MMV202553	KINETOPLASTIDS		269.304	269.304	C15H15N3O2			2.3157	CCC(=O)Nc1ccccc1C(=O)Nc2ccccn2
55	PathogenBox_PlateA	F06	34.0524	58.6092	36.6493	38.4389	MMV688936	TUBERCULOSIS		386.855	386.855	C18H15N4O2ClS			3.7457	Clc1cccc2sc(nc12)N(CCCn3ccnc3)C(=O)c4occc4
56	PathogenBox_PlateA	F07	35.3296	14.2185	39.9031	40.5232	MMV676476	TUBERCULOSIS		380.434	380.434	C23H24O5			4.0281	CC1=C(CCC(=O)O)C(=O)Oc2c(C)c(OCc3cc(C)cc(C)c3)ccc12
57	PathogenBox_PlateA	F08	85.8168	20.1377	95.7224	6.91524	MMV676377	TUBERCULOSIS		318.126	318.126	C13H8N3O2Br			2.5447	Brc1c(nc2ncccn12)c3ccc4OCOc4c3
58	PathogenBox_PlateA	F09	106.255	36.1416	89.8583	4.59024	MMV676406	TUBERCULOSIS		475.606	475.606	C26H29N5O2S			3.0871	CC(C)n1ncc2c(cc(nc12)c3ccccc3)C(=O)NCC(N4CCOCC4)c5cccs5
59	PathogenBox_PlateA	F10	108.505	59.9149	91.348	5.9721	MMV676461	TUBERCULOSIS		357.427	357.427	C18H19N3O3S			4.4718	CCOC(=O)c1cc(on1)c2csc(Nc3c(C)cc(C)cc3C)n2
60	PathogenBox_PlateA	F11	78.4948	3.98005	93.0852	12.5811	MMV676509	TUBERCULOSIS		376.836	376.836	C22H17N2O2Cl			5.4099	Cc1ccc2oc(nc2c1)c3cc(NC(=O)Cc4ccccc4)ccc3Cl
61	PathogenBox_PlateA	G02	100.378	38.163	90.3502	15.2422	MMV688470	TOXOPLASMOSIS		464.583	464.583	C24H28N6O2S			3.1154	CS(=O)(=O)N1CCC(CCn2nc(Cc3cccc4ccccc34)c3c(N)ncnc23)CC1
62	PathogenBox_PlateA	G03	109.444	58.4143	114.966	18.8704	MMV688704	TOXOPLASMOSIS		391.294	391.294	C19H20N4OCl2			4.7676	Cc1cc2nc(NC(=O)C(C)(C)C)nc(Cl)c2n1Cc1ccc(Cl)cc1
63	PathogenBox_PlateA	G04	94.47	32.4802	96.6337	1.79312	MMV188296	KINETOPLASTIDS		312.344	312.344	C18H17N2O2F			2.2949	CNC(=O)C1Cc2ccccc2N1C(=O)Cc3ccc(F)cc3
64	PathogenBox_PlateA	G05	97.6283	36.168	86.3831	21.2102	MMV688958	KINETOPLASTIDS		308.397	308.397	C18H16N2OS			3.6557	O=C(NCCc1csc(n1)c2ccccc2)c3ccccc3
65	PathogenBox_PlateA	G06	93.1287	25.9876	107.08	12.6421	MMV063404	TUBERCULOSIS		345.874	345.874	C19H24N3OCl			3.5172	Cc1nn(Cc2ccccc2)c(Cl)c1C(=O)NC3CCCCCC3
66	PathogenBox_PlateA	G07	3.73705	3.55297	0.762246	0.801119	MMV676558	TUBERCULOSIS		371.455	371.455	C22H17N3OS			5.5246	CC1=NN(C(=O)C1Cc2cccc3ccccc23)c4nc5ccccc5s4
67	PathogenBox_PlateA	G08	91.0563	21.0706	97.2216	4.82486	MMV688555	TUBERCULOSIS		339.84	339.84	C15H18N3O2ClS			2.4307	Clc1ccc(CN2CCN(CC2)C(=O)NCc3occc3)s1
68	PathogenBox_PlateA	G09	85.9273	11.9176	115.218	1.0047	MMV676597	TUBERCULOSIS		343.423	343.423	C18H25N5O2			3.7724	CCCn1nnc(NC(=O)COc2ccc(cc2)C3CCCCC3)n1
69	PathogenBox_PlateA	G10	97.2798	29.9891	76.3054	19.5324	MMV676588	TUBERCULOSIS		258.382	258.382	C15H18N2S			3.4666	Nc1c2CCCCc2nc3sc4CCCCc4c13
70	PathogenBox_PlateA	G11	99.1129	40.6078	86.6728	11.0287	MMV676554	TUBERCULOSIS		335.357	335.357	C19H17N3O3			3.2723	COc1ccc(Nc2ccccc2NC(=O)c3ccc(O)nc3)cc1
71	PathogenBox_PlateA	H02	127.037	52.4018	99.6067	8.20928	MMV688350	DENGUE		465.497	465.497	C24H20N3O4FS			3.0515	COC(=O)c1ccc(F)cc1NS(=O)(=O)c2cccc(c2)c3cnn(Cc4ccccc4)c3
72	PathogenBox_PlateA	H03	115.251	46.8624	103.569	1.74458	MMV688360	KINETOPLASTIDS		421.532	421.532	C25H31N3O3			3.919	COc1ccc(cc1OCc2ccccn2)C3=NN(C4CCCCCC4)C(=O)C3(C)C
73	PathogenBox_PlateA	H04	45.502	21.349	63.3134	22.4485	MMV099637	KINETOPLASTIDS		297.333	297.333	C17H16N3OF			2.9367	Cc1nn2c(O)c3CCCCc3nc2c1c4ccc(F)cc4
74	PathogenBox_PlateA	H05	106.547	32.6846	115.219	7.86031	MMV688798	KINETOPLASTIDS		365.445	365.445	C21H19NO3S			3.4766	CS(=O)(=O)c1ccccc1C(=O)N(Cc2ccccc2)c3ccccc3
75	PathogenBox_PlateA	H06	74.1178	8.6538	103.79	5.99478	MMV676539	TUBERCULOSIS		332.353	332.353	C20H16N2O3			2.5026	O=C(NCCc1c[nH]c2ccccc12)C3=Cc4ccccc4OC3=O
76	PathogenBox_PlateA	H07	82.6947	6.35089	106.869	12.9628	MMV202458	TUBERCULOSIS		319.788	319.788	C17H18NO3Cl			3.6212	COc1ccc(OC(C)C(=O)Nc2ccc(Cl)cc2C)cc1
77	PathogenBox_PlateA	H08	101.627	21.4441	102.592	0.90059	MMV676474	TUBERCULOSIS		336.427	336.427	C21H24N2O2			4.5058	COc1ccccc1OCCCCn2c(nc3ccccc23)C4CC4
78	PathogenBox_PlateA	H09	85.2448	2.98701	104.727	7.80027	MMV461553	TUBERCULOSIS		419.368	419.368	C18H14NO3F5S			4.7791	COC(=O)c1c2CCCCCc2sc1NC(=O)c3c(F)c(F)c(F)c(F)c3F
79	PathogenBox_PlateA	H10	101.924	19.7788	84.608	20.4713	MMV676520	TUBERCULOSIS		364.394	364.394	C21H20N2O4			3.4784	O=C(N1CCN(Cc2ccc3OCOc3c2)CC1)c4oc5ccccc5c4
80	PathogenBox_PlateA	H11	5.15178	6.6287	13.4122	18.8031	MMV676512	TUBERCULOSIS		347.394	347.394	C18H13N5OS			2.9493	O=C(Nc1nc(cs1)c2ccccn2)c3cncn3c4ccccc4
81	PathogenBox_PlateB	A02	148.946	80.9603	84.2093	10.9081	MMV676480	ONCHOCERCIASIS		474.528	474.528	C26H22N2O5S			3.4297	COC(=O)c1c2CCN(Cc3ccccc3)Cc2sc1NC(=O)C4=Cc5ccccc5OC4=O
82	PathogenBox_PlateB	A03	88.0013	13.8654	88.16	15.12	MMV652003	KINETOPLASTIDS		321.062	321.062	C15H11NO3BF3			2.6184	OB1OCc2ccc(NC(=O)c3ccccc3C(F)(F)F)cc12
83	PathogenBox_PlateB	A04	37.1108	31.8215	145.962	195.894	MMV000062	REFERENCE COMPOUNDS	Pentamidine	592.687	340.427	C19H24N4O2	Isethionic Acid	2	1.7544	NC(=N)c1ccc(OCCCCCOc2ccc(cc2)C(=N)N)cc1
84	PathogenBox_PlateB	A05	172.096	111.784	96.0885	11.7067	MMV006372	MALARIA		269.35	269.35	C15H19N5			1.6173	CN(C)CCNc1ncnc2c3cc(C)ccc3[nH]c12
85	PathogenBox_PlateB	A06	99.2988	11.1472	96.991	13.426	MMV688854	CRYPTOSPORIDIOSIS		452.979	416.519	C24H28N6O	Hydrochloride	1	3.259	CCOc1ccc2cc(ccc2c1)c3nn(CC4CCN(C)CC4)c5ncnc(N)c35
86	PathogenBox_PlateB	A07	1.93056	0.442094	47.8352	37.7123	MMV011903	MALARIA		374.404	374.404	C20H18N6O2			2.8797	Cc1ccc(NC(=O)c2nc[nH]c2C(=O)Nc3nc4ccccc4[nH]3)c(C)c1
87	PathogenBox_PlateB	A08	157.657	101.367	84.6395	21.2406	MMV020591	MALARIA		385.467	385.467	C24H23N3O2			3.9509	CC(C)C(NC(=O)Cc1cccc2ccccc12)C(=O)Nc3cccc(c3)C#N
88	PathogenBox_PlateB	A09	90.4681	20.028	90.2063	6.24475	MMV020623	MALARIA		414.509	414.509	C25H26N4O2			4.544	Cc1onc(C)c1C(=O)N2CCCC(C2)c3[nH]c4c(C)cccc4c3c5ccncc5
89	PathogenBox_PlateB	A10	103.817	14.5139	86.9022	11.2534	MMV020512	MALARIA		415.493	415.493	C25H25N3O3			3.7633	Cc1ccc(Oc2ccc(NC(=O)CNc3ccccc3N4CCCC4=O)cc2)cc1
90	PathogenBox_PlateB	A11	108.225	18.4232	91.6525	7.54929	MMV688761	SCHISTOSOMIASIS		461.511	461.511	C20H19N3O6S2			2.2391	CS(=O)(=O)c1ccc(cc1[N+](=O)[O-])C(=O)N(CC2CCCO2)c3nc4ccccc4s3
91	PathogenBox_PlateB	B02	133.023	76.1377	78.0738	13.5682	MMV012074	TUBERCULOSIS		299.761	299.761	C16H14N3OCl			2.5169	Cc1nc2ccccn2c1C(=O)NCc3ccc(Cl)cc3
92	PathogenBox_PlateB	B03	150.276	103.107	89.7441	4.30256	MMV676604	KINETOPLASTIDS		371.457	371.457	C18H21N5O2S			2.1093	CC(C)n1c(C)ncc1c2ccnc(Nc3ccc(cc3)S(=O)(=O)C)n2
93	PathogenBox_PlateB	B04	101.879	18.322	79.2909	23.5456	MMV002529	REFERENCE COMPOUNDS	Praziquantel	312.413	312.413	C19H24N2O2			2.5396	O=C(C1CCCCC1)N2CC3N(CCc4ccccc34)C(=O)C2
94	PathogenBox_PlateB	B05	61.4638	39.6762	60.2506	9.78917	MMV687776	LYMPHATIC FILARIASIS		609.204	609.204	C28H23N2O4BCl2F4			7.7063	Cc1cc(ccc1C(=O)NCc2ccc3B(O)OC(C)(C)c3c2)C4=NOC(C4)(c5cc(Cl)c(F)c(Cl)c5)C(F)(F)F
95	PathogenBox_PlateB	B06	48.2216	42.0729	29.5777	50.5521	MMV687800	REFERENCE COMPOUNDS	Clofazimine	473.396	473.396	C27H22N4Cl2			6.2781	CC(C)N=C1C=C2N(c3ccc(Cl)cc3)c4ccccc4N=C2C=C1Nc5ccc(Cl)cc5
96	PathogenBox_PlateB	B07	143.374	89.4729	80.5987	4.41326	MMV020982	MALARIA		374.444	374.444	C22H22N4O2			3.5347	CC(C)(C)c1cc(cc(c1)C(=O)Nc2cccnc2)C(=O)Nc3cccnc3
97	PathogenBox_PlateB	B08	71.1008	42.8372	76.7595	14.8334	MMV020120	MALARIA		354.538	354.538	C23H34N2O			3.7406	CC1CC1C(=O)NC2CCN(CC3(CCCCC3)c4ccccc4)CC2
98	PathogenBox_PlateB	B09	97.0146	17.8173	81.6125	9.09147	MMV676605	MALARIA		421.494	421.494	C26H23N5O			4.0356	C[C@@]1(O)C[C@@H](C1)c2nc(c3ccc4ccc(nc4c3)c5ccccc5)c6c(N)nccn26
99	PathogenBox_PlateB	B10	153.08	102.206	76.8891	14.5752	MMV007638	MALARIA		416.518	416.518	C20H20N2O4S2			3.6826	CCOc1ccc(cc1)c2nc(NC(=O)CS(=O)(=O)c3ccccc3)sc2C
100	PathogenBox_PlateB	B11	80.7784	20.184	76.7923	3.11608	MMV021057	MALARIA	Azoxystrobin	403.394	403.394	C22H17N3O5			2.9412	CO\C=C(\C(=O)OC)/c1ccccc1Oc2cc(Oc3ccccc3C#N)ncn2
101	PathogenBox_PlateB	C02	0.119817	0.207529	0	0	MMV690027	KINETOPLASTIDS		584.708	584.708	C33H40N6O4			5.4432	COC1=C(OCCCCOC2=CC=C(C3=NNN=N3)C=C2)C=C(C([C@@H]4[C@H]5CC=CC4)=NN(C6CCCCCC6)C5=O)C=C1
102	PathogenBox_PlateB	C03	86.3438	14.7005	82.8936	11.4386	MMV676600	KINETOPLASTIDS		474.555	474.555	C26H30N6O3			0.7341	CO[C@@H](C(=O)N1Cc2[nH]nc(NC(=O)c3ccc(cc3)N4CCN(C)CC4)c2C1)c5ccccc5
103	PathogenBox_PlateB	C04	78.8455	17.3403	76.548	10.4358	MMV676382	SCHISTOSOMIASIS		377.443	377.443	C20H23N7O			1.683	Cn1ncc2c(nc(NCCc3c[nH]c4ccccc34)nc12)N1CCOCC1
104	PathogenBox_PlateB	C05	90.0618	16.3514	84.811	12.08	MMV001625	REFERENCE COMPOUNDS	alpha-Difluoromethylornithine	236.6	182.17	C6H12N2O2F2	Hydrochloride hydrate	1	-4.9852	NCCCC(N)(C(F)F)C(=O)O
105	PathogenBox_PlateB	C06	73.6264	34.3145	73.1133	14.9953	MMV001493	ONCHOCERCIASIS	Isradipine	371.387	371.387	C19H21N3O5			3.192	COC(=O)C1=C(C)NC(=C(C1c2cccc3nonc23)C(=O)OC(C)C)C
106	PathogenBox_PlateB	C07	129.392	57.6871	79.6902	12.4378	MMV020136	MALARIA		366.462	366.462	C15H18N4O3S2			0.9629	CNC(=O)c1cc(cs1)S(=O)(=O)N2CCN(CC2)c3ccccn3
107	PathogenBox_PlateB	C08	80.2913	29.1576	79.4075	7.1465	MMV020710	MALARIA		399.838	399.838	C19H18N5O3Cl			1.9842	COc1ccc(Cl)cc1NC(=O)CN(C)C(=O)c2cnn(n2)c3ccccc3
108	PathogenBox_PlateB	C09	83.8064	45.0897	81.5761	10.5355	MMV020517	MALARIA		364.449	364.449	C21H24N4O2			3.0159	COc1ccccc1CNC(=O)c2cc(nc3c2cnn3C(C)C)C4CC4
109	PathogenBox_PlateB	C10	137.822	69.6198	83.9123	6.71364	MMV019721	MALARIA		437.968	437.968	C19H20N3O3ClS2			3.7954	CCN(CC)S(=O)(=O)c1ccc(Cl)c(c1)C(=O)Nc2ccc3nc(C)sc3c2
110	PathogenBox_PlateB	C11	110.261	51.6764	81.8975	1.78262	MMV688763	SCHISTOSOMIASIS		351.834	351.834	C13H10N5OClS2			2.875	CNc1nnc(SC2=C(Cl)C(=O)N(N=C2)c3ccccc3)s1
111	PathogenBox_PlateB	D02	85.4964	14.0972	73.8139	19.5312	MMV020537	MALARIA		334.825	334.825	C16H15N2O2ClS			3.8936	Clc1ccc2OCCN(c3ccc(s3)C(=O)NC4CC4)c2c1
112	PathogenBox_PlateB	D03	85.8831	15.2344	78.6878	8.78393	MMV637953	REFERENCE COMPOUNDS	Suramin	1435.28	1297.28	C51H40N6O23S6	Sodium	6	-2.9082	Cc1ccc(cc1NC(=O)c2cccc(NC(=O)Nc3cccc(c3)C(=O)Nc4cc(ccc4C)C(=O)Nc5ccc(c6cc(cc(c56)S(=O)(=O)O)S(=O)(=O)O)S(=O)(=O)O)c2)C(=O)Nc7ccc(c8cc(cc(c78)S(=O)(=O)O)S(=O)(=O)O)S(=O)(=O)O
113	PathogenBox_PlateB	D04	84.7532	13.3021	95.44	33.2765	MMV676536	SCHISTOSOMIASIS		373.492	373.492	C18H19N3O2S2			3.0459	COCC(C)NC(=O)CSc1ncnc2sc(cc12)-c1ccccc1
114	PathogenBox_PlateB	D05	83.1863	14.6162	81.5568	14.2332	MMV000063	REFERENCE COMPOUNDS	Sitamaquine	515.71	343.515	C21H33N3O	Tosic Acid	1	4.2265	CCN(CC)CCCCCCNc1cc(OC)cc2c(C)ccnc12
115	PathogenBox_PlateB	D06	87.2576	15.3765	75.8639	17.0857	MMV689255	CRYPTOSPORIDIOSIS	D-Eritadenine	253.215	253.215	C9H11N5O4			-2.5397	Nc1ncnc2c1ncn2C[C@@H](O)[C@@H](O)C(=O)O
116	PathogenBox_PlateB	D07	123.409	50.2987	78.2472	13.4527	MMV019838	MALARIA		412.293	412.293	C18H10N4OF6			3.934	FC(F)(F)c1cc(cc(c1)C(F)(F)F)C(=O)Nc2ccnc(n2)c3cccnc3
117	PathogenBox_PlateB	D08	102.07	19.0369	71.5556	13.3725	MMV020520	MALARIA		417.509	417.509	C25H27N3O3			3.4132	Cc1cc2ccccc2n1CC(=O)N3CC(Oc4ccccc34)C(=O)N5CCCCC5
118	PathogenBox_PlateB	D09	99.7052	26.0955	75.3704	3.00558	MMV019234	MALARIA		382.438	382.438	C20H18N2O4S			3.5875	COc1ccc(cc1OC)C2CC(=NN2C(=O)c3occc3)c4cccs4
119	PathogenBox_PlateB	D10	104.621	36.7622	73.9038	22.2316	MMV016136	MALARIA		349.825	349.825	C19H16N5Cl			3.5042	Cc1cc(Nc2ccncc2)n3nc(C)c(c4ccccc4Cl)c3n1
120	PathogenBox_PlateB	D11	107.595	23.3005	88.4524	4.27358	MMV688762	SCHISTOSOMIASIS		353.46	353.46	C24H23N3			4.632	C1CCN(C1)C(c2ccccn2)c3c([nH]c4ccccc34)c5ccccc5
121	PathogenBox_PlateB	E02	101.532	23.4104	75.3429	22.1851	MMV676386	TUBERCULOSIS		335.357	335.357	C19H17N3O3			3.0336	Cc1cccc(Cn2ccc(NC(=O)c3ccc4OCOc4c3)n2)c1
122	PathogenBox_PlateB	E03	113.835	47.9581	79.1024	10.2648	MMV688773	REFERENCE COMPOUNDS	Benznidazole	260.249	260.249	C12H12N4O3			-0.248	[O-][N+](=O)c1nccn1CC(=O)NCc2ccccc2
123	PathogenBox_PlateB	E04	1.89449	3.28136	10.3937	17.5004	MMV000011	REFERENCE COMPOUNDS	Doxycycline	480.9	444.44	C22H24N2O8	Hydrochloride	1	-1.1715	C[C@@H]1[C@H]2[C@H](O)[C@H]3[C@H](N(C)C)C(=C(C(=O)N)C(=O)[C@@]3(O)C(=C2C(=O)c4c(O)cccc14)O)O
124	PathogenBox_PlateB	E05	0.81867	0.820924	15.444	15.1729	MMV687775	LYMPHATIC FILARIASIS		462.03	462.03	C19H14NO3BCl2F4			6.5055	CC1(C)OB(O)c2ccc(cc12)C3=NOC(C3)(c4cc(Cl)c(F)c(Cl)c4)C(F)(F)F
125	PathogenBox_PlateB	E06	-0.0569279	0.098602	0.68763	0.607365	MMV002817	ONCHOCERCIASIS	Iodoquinol	396.953	396.953	C9H5NOI2			2.5041	Oc1c(I)cc(I)c2cccnc12
126	PathogenBox_PlateB	E07	124.706	64.4295	82.3842	8.88658	MMV676442	MALARIA		415.531	415.531	C25H29N5O			3.8179	CC(C)c1ncc(c2ccncc2)c(n1)[C@@H]3CC[C@@H](CNC(=O)c4cccnc4)CC3
127	PathogenBox_PlateB	E08	118.461	42.4066	103.077	36.3042	MMV020152	MALARIA		278.311	278.311	C17H14N2O2			3.3285	Cc1onc(c1)C(=O)Nc2ccc(cc2)c3ccccc3
128	PathogenBox_PlateB	E09	107.915	16.1584	91.6592	9.06594	MMV024397	MALARIA		335.451	335.451	C21H25N3O			3.5228	O=C(NC1CC1)c2ccc(nc2)N3CCC(Cc4ccccc4)CC3
129	PathogenBox_PlateB	E10	115.971	45.8421	72.3542	15.9045	MMV019807	MALARIA		323.783	323.783	C18H14N3OCl			3.1531	Cc1ccc2cc(C3NC(=O)c4ccccc4N3)c(Cl)nc2c1
130	PathogenBox_PlateB	E11	0.354366	0.613781	0.646212	1.11927	MMV560185	MALARIA		289.382	289.382	C19H19N3			3.6489	C1CCN(CC1)c2cc(nc3ccccc23)c4ccccn4
131	PathogenBox_PlateB	F02	0.431877	0.483496	0.433862	0.784446	MMV019189	MALARIA		309.391	309.391	C17H15N3OS			3.8835	Cc1ccc2c(NC(=O)C23NN=C(S3)c4ccccc4)c1C
132	PathogenBox_PlateB	F03	77.4978	0.792971	76.2104	4.76388	MMV688774	REFERENCE COMPOUNDS	Posaconazole	700.777	700.777	C37H42N8O4F2			4.2308	CC[C@@H]([C@H](C)O)N1N=CN(C1=O)c2ccc(cc2)N3CCN(CC3)c4ccc(OC[C@@H]5CO[C@](Cn6cncn6)(C5)c7ccc(F)cc7F)cc4
133	PathogenBox_PlateB	F04	36.7332	32.8078	38.5765	43.2948	MMV003270	HOOKWORM	Zoxazolamine	168.583	168.583	C7H5N2OCl			1.9696	ClC1=CC(N=C(N)O2)=C2C=C1
134	PathogenBox_PlateB	F05	78.1185	42.6194	86.3389	9.2337	MMV637229	TRICHURIASIS	Clemastine	459.968	343.898	C21H26NOCl	Fumaric Acid	1	4.5988	ClC1=CC=C([C@@](C)(C2=CC=CC=C2)OCCC3N(C)CCC3)C=C1
135	PathogenBox_PlateB	F06	83.0676	23.0137	77.6039	17.2045	MMV688853	CRYPTOSPORIDIOSIS		389.878	353.418	C19H23N5O2	Hydrochloride	1	1.7526	CCOc1ccc2cc(cnc2c1)c3nn(c(N)c3C(=O)N)C(C)(C)C
136	PathogenBox_PlateB	F07	112.204	22.8721	86.7702	5.38956	MMV020321	MALARIA		386.801	386.801	C18H18N2O2ClF3			3.4794	COc1ccccc1C(C)NCC(=O)Nc2cc(ccc2Cl)C(F)(F)F
137	PathogenBox_PlateB	F08	81.3854	16.0866	240.382	278.064	MMV019087	MALARIA		420.395	420.395	C19H19N6O2F3			1.6094	Cc1cc(C)n2nc(nc2n1)C(=O)Nc3cc(ccc3N4CCOCC4)C(F)(F)F
138	PathogenBox_PlateB	F09	112.319	32.6144	110.665	31.1866	MMV676528	MALARIA		433.884	433.884	C20H17N3O3ClFS			3.4666	CN(c1ccc(F)cc1)S(=O)(=O)c2ccc(Cl)c(c2)C(=O)Nc3cccc(C)n3
139	PathogenBox_PlateB	F10	0.18044	0.312532	0.309631	0.376034	MMV020320	MALARIA		359.389	359.389	C20H17N5O2			2.855	Cc1oc(NC(=O)c2cn(nc2c3ccccc3C)c4ccccc4)nn1
140	PathogenBox_PlateB	F11	119.828	42.6244	89.3008	4.6569	MMV085210	MALARIA		445.969	445.969	C22H24N3O3ClS			3.7148	Clc1ccc(cc1)S(=O)(=O)NC(Cc2c[nH]c3ccccc23)C(=O)N4CCCCC4
141	PathogenBox_PlateB	G02	84.9943	18.5479	74.7792	22.3741	MMV069458	TUBERCULOSIS		222.557	222.557	C6H2N4ClF3			0.6132	FC(F)(F)c1nnc2ccc(Cl)nn12
142	PathogenBox_PlateB	G03	35.5202	5.83876	42.546	17.5526	MMV688991	REFERENCE COMPOUNDS	Nitazoxanide	307.282	307.282	C12H9N3O5S			1.6871	CC(=O)Oc1ccccc1C(=O)Nc2ncc(s2)[N+](=O)[O-]
143	PathogenBox_PlateB	G04	77.0294	20.9932	88.6976	6.4153	MMV687801	REFERENCE COMPOUNDS	Ethambutol	277.23	204.31	C10H24N2O2	Hydrochloride	2	-0.3822	CC[C@H](CO)NCCN[C@H](CC)CO
144	PathogenBox_PlateB	G05	36.2881	11.0461	17.3161	28.4047	MMV689480	REFERENCE COMPOUNDS	Buparvaquone	326.429	326.429	C21H26O3			4.6861	O=C1C(CC2CCC(C(C)(C)C)CC2)=C(C(C3=C1C=CC=C3)=O)O
145	PathogenBox_PlateB	G06	74.9383	28.3043	86.0004	8.22023	MMV003152	REFERENCE COMPOUNDS	Mebendazole	295.298	295.298	C16H13N3O3			2.6656	COC(=O)Nc1nc2cc(ccc2[nH]1)C(=O)c3ccccc3
146	PathogenBox_PlateB	G07	112.398	37.4686	94.7177	14.8166	MMV006239	MALARIA		368.239	368.239	C18H14N3OBr			2.4326	Brc1ccc2NC(=O)C3(NCCc4c3[nH]c5ccccc45)c2c1
147	PathogenBox_PlateB	G08	92.6076	17.2071	93.7048	21.6101	MMV000858	MALARIA		399.919	399.919	C16H18N3O3ClS2			2.207	Clc1ccc(cc1)S(=O)(=O)N2CCN(CC2)C(=S)NCc3occc3
148	PathogenBox_PlateB	G09	121.659	11.3939	103.121	27.3737	MMV006741	MALARIA		378.476	378.476	C22H26N4O2			3.1909	COc1cc2ncnc(NC3CCN(Cc4ccccc4)CC3)c2cc1OC
149	PathogenBox_PlateB	G10	86.0838	38.5448	48.9645	24.9889	MMV688768	SCHISTOSOMIASIS		325.471	325.471	C19H23N3S			3.3806	CN1CCN(CC1)C(c2cccs2)c3c(C)[nH]c4ccccc34
150	PathogenBox_PlateB	G11	126.786	59.9474	90.5956	4.00267	MMV000023	REFERENCE COMPOUNDS	Primaquine	455.353	259.353	C15H21N3O	Phosphoric Acid	2	1.9025	COc1cc(NC(C)CCCN)c2ncccc2c1
151	PathogenBox_PlateB	H02	92.6079	19.1758	88.6534	21.0809	MMV676602	KINETOPLASTIDS		460.575	460.575	C25H32N8O			2.0948	CNC(=O)c1nn(C)c2c3nc(Nc4ccc(cc4)N5CCN(C)CC5)ncc3CC(C)(C)c12
152	PathogenBox_PlateB	H03	97.6668	18.3963	94.0307	6.0691	MMV000014	REFERENCE COMPOUNDS	Mefloquine	414.776	378.316	C17H16N2OF6	Hydrochloride	1	3.5076	O[C@H]([C@H]1CCCCN1)c2cc(nc3c(cccc23)C(F)(F)F)C(F)(F)F
153	PathogenBox_PlateB	H04	3.0539	1.56109	3.90293	5.23971	MMV687803	REFERENCE COMPOUNDS	Linezolid	337.346	337.346	C16H20N3O4F			0.5203	CC(=O)NC[C@@H]1CN(C(=O)O1)c2ccc(N3CCOCC3)c(F)c2
154	PathogenBox_PlateB	H05	100.507	35.3856	98.8437	12.8386	MMV668727	ONCHOCERCIASIS		384.283	384.283	C17H10N4F6			3.454	Nc1ncc(cc1c2ccc(nc2)C(F)(F)F)c3ccc(nc3)C(F)(F)F
155	PathogenBox_PlateB	H06	83.0683	18.6766	117.842	38.5802	MMV019742	MALARIA		410.496	410.496	C21H22N4O3S			2.354	Cc1ccc(cc1)S(=O)(=O)N2CCN(CC2)C(=O)c3cc([nH]n3)c4ccccc4
156	PathogenBox_PlateB	H07	97.5222	11.1757	94.2482	5.49354	MMV009054	MALARIA		351.193	351.193	C15H12N4O2Cl2			2.3011	Cc1onc(c1)C(=O)Nc2cnn(Cc3ccc(Cl)cc3Cl)c2
157	PathogenBox_PlateB	H08	86.9804	34.3136	104.801	8.60055	MMV006901	MALARIA		306.369	306.369	C18H18N4O			3.3648	CN(C)c1cc(NC(=O)Nc2ccccc2)c3ccccc3n1
158	PathogenBox_PlateB	H09	85.9858	21.595	110.255	23.6507	MMV020391	MALARIA		394.921	394.921	C19H23N2O3ClS			3.73	CC(C)C(C(=O)Nc1ccc(cc1)S(=O)(=O)N(C)C)c2ccc(Cl)cc2
159	PathogenBox_PlateB	H10	104.429	12.8781	96.4706	10.6259	MMV676380	MALARIA		370.79	370.79	C18H15N4O3Cl			2.4689	CC(=O)Nc1ccc(NC(=O)c2cc([nH]n2)c3cc(Cl)ccc3O)cc1
160	PathogenBox_PlateB	H11	86.1397	17.7258	99.8794	10.1494	MMV688994	REFERENCE COMPOUNDS	Streptomycin	725.499	581.574	C21H39N7O12	Sulfate	1.5	-8.2075	CNC1C(O)C(O)C(CO)OC1OC2C(OC3C(O)C(O)C(NC(=N)N)C(O)C3NC(=N)N)OC(C)C2(O)C=O
161	PathogenBox_PlateC	A02	75.8329	18.9463	93.6728	14.0419	MMV675997	KINETOPLASTIDS		424.511	424.511	C24H29N4O2F			3.4773	Fc1ccc(cc1)N2CCN(CCCCN(CC#N)C(=O)OCc3ccccc3)CC2
162	PathogenBox_PlateC	A03	121.883	66.5439	106.479	17.3894	MMV676204	ONCHOCERCIASIS		334.387	334.387	C21H19N2OF			4.2993	Fc1ccc(cc1)C(=O)N(CCNc2ccccc2)c3ccccc3
163	PathogenBox_PlateC	A04	84.1065	6.10038	105.569	22.5203	MMV687239	TUBERCULOSIS		341.355	341.355	C19H17N3OF2			2.8356	CC(C)(C(=O)Nc1ccc(F)cc1)n2cc(cn2)c3ccccc3F
164	PathogenBox_PlateC	A05	0.8879	0.286187	0.0155175	0.0268772	MMV688122	TUBERCULOSIS		320.372	320.372	C16H12N6S			2.8589	Cc1cccc(n1)c2nc(Nc3ccncn3)c4sccc4n2
165	PathogenBox_PlateC	A06	104.507	50.6334	91.4674	3.10094	MMV688852	TOXOPLASMOSIS		333.791	333.791	C16H17N5ClF			2.8761	CC(C)(C)n1nc(Cc2ccc(F)c(Cl)c2)c2c(N)ncnc12
166	PathogenBox_PlateC	A07	73.0256	10.4291	92.3297	11.0192	MMV687145	TUBERCULOSIS		267.347	267.347	C12H17N3O2S			1.4933	CCCCS(=O)(=O)Nc1ccc2cnn(C)c2c1
167	PathogenBox_PlateC	A08	0.637244	0.995429	0.541536	0.937969	MMV688327	TUBERCULOSIS	Radezolid	474.915	438.455	C22H23N6O3F	Hydrochloride	1	0.8782	CC(=O)NCC1CN(C(=O)O1)c2ccc(c(F)c2)c3ccc(CNCc4cn[nH]n4)cc3
168	PathogenBox_PlateC	A09	100.801	27.0352	102.662	13.5937	MMV008439	MALARIA		384.52	384.52	C23H32N2O3			2.3927	COc1ccc(CN2CCOc3ccc(cc3C2)C(C)(O)CN(C)C)cc1C
169	PathogenBox_PlateC	A10	3.3077	3.2906	0.274092	0.474741	MMV595321	KINETOPLASTIDS		458.541	458.541	C21H26N6O4S			2.376	CC1=C(C)C(NC(N2N=C(C)C=C2NC(C3=CC=C(S(=O)(N(CC)CC)=O)C=C3)=O)=N1)=O
170	PathogenBox_PlateC	A11	176.208	162.074	94.8264	9.93693	MMV687747	TUBERCULOSIS		385.254	385.254	C19H17N2O2Br			3.5305	Cc1cc(OCC(=O)NCc2ccccc2)c3cc(Br)ccc3n1
171	PathogenBox_PlateC	B02	94.4085	31.7355	92.024	10.5671	MMV020388	MALARIA		365.905	365.905	C19H28N3O2Cl			2.6934	CC(Nc1cc(Cl)ccc1N2CCOCC2)C(=O)N3CCCC(C)C3
172	PathogenBox_PlateC	B03	87.9489	20.6762	99.8824	10.4018	MMV688547	KINETOPLASTIDS		613.469	387.438	C21H21N7O	Trifluoroacetate	2	0.896	COc1ccc(cc1c2cn(nn2)c3cccc(c3)C4=NCCN4)C5=NCCN5
173	PathogenBox_PlateC	B04	35.0427	38.0537	91.4305	14.3856	MMV688466	TUBERCULOSIS		502.003	465.543	C24H24N5O2FS	Hydrochloride	1	2.4271	Cn1ccnc1CNCCS(=O)(=O)c2cccc(Nc3ccc(cn3)c4cccc(F)c4)c2
174	PathogenBox_PlateC	B05	90.479	20.936	93.3022	11.7247	MMV687749	TUBERCULOSIS		448.947	412.487	C24H24N6O	Hydrochloride	1	3.1276	C([C@@H]1CN(CCN1)c2nccc(Oc3ccc(cc3)n4ccnc4)n2)c5ccccc5
175	PathogenBox_PlateC	B06	102.113	49.7459	93.7261	15.1001	MMV688846	TUBERCULOSIS		383.835	383.835	C20H21NOClF3			4.9457	Cc1ccccc1CN2CCC(O)(CC2)c3ccc(Cl)c(c3)C(F)(F)F
176	PathogenBox_PlateC	B07	91.7215	26.783	88.4141	9.77381	MMV054312	TUBERCULOSIS		240.306	240.306	C15H16N2O			2.8079	CC(=O)N1CCc2cc3nc(C)cc(C)c3cc12
177	PathogenBox_PlateC	B08	72.2192	28.1447	89.0364	2.09263	MMV689060	KINETOPLASTIDS		313.226	313.226	C14H18N4Cl2			2.2856	Clc1ccc(CN2CCN(CC2)C3=NCCN3)cc1Cl
178	PathogenBox_PlateC	B09	107.929	44.0279	109.426	44.2407	MMV689061	KINETOPLASTIDS		422.495	422.495	C24H27N4O2F			4.0942	CC1=C(F)C=CC=C1CN2CCCC(CC3=NC(C4=CC=C(NC(C)=O)C=C4)=NO3)C2
179	PathogenBox_PlateC	B10	114.053	40.362	103.772	9.5872	MMV689028	KINETOPLASTIDS		474.575	474.575	C26H26N4O3S			3.34	O=C(N1CCN(CC2=CC=C(NS(=O)(C3=CC=C(C)C=C3)=O)C=C2)CC1)C4=CC(C#N)=CC=C4
180	PathogenBox_PlateC	B11	25.0131	43.324	68.3016	61.2159	MMV688371	KINETOPLASTIDS		449.757	449.757	C22H19N2O2Cl3			5.3044	NCCN(C(=O)c1ccc(Cl)cc1Cl)c2ccc(OCc3ccc(Cl)cc3)cc2
181	PathogenBox_PlateC	C02	0.213594	0.369956	0	0	MMV688508	TUBERCULOSIS		358.364	358.364	C19H19N2O4F			1.9132	CC(=O)NCC1CN(C(=O)O1)c2ccc(c(F)c2)c3ccc(CO)cc3
182	PathogenBox_PlateC	C03	102.944	47.3984	92.1693	8.52525	MMV688283	KINETOPLASTIDS		494.996	494.996	C24H23N6O2ClS			3.7297	CN1CCN(CC1)S(=O)(=O)c2ccc(cc2)c3ccc4c(Nc5ncc(Cl)cn5)ccnc4c3
183	PathogenBox_PlateC	C04	73.3817	28.7838	85.2126	9.93967	MMV687243	TUBERCULOSIS		336.181	336.181	C15H14NO3Br			2.8271	NC(=O)c1cc(Br)ccc1OCCOc2ccccc2
184	PathogenBox_PlateC	C05	62.9235	63.3572	29.6341	39.9648	MMV687730	TUBERCULOSIS		384.515	384.515	C22H32N4O2			4.9985	CCCCOC(=O)Nc1cc2nc([nH]c2cc1N3CCCC3)C4CCCCC4
185	PathogenBox_PlateC	C06	93.0088	115.672	40.144	31.5381	MMV687251	TUBERCULOSIS		275.305	275.305	C8H9N3O4S2			-0.043	CN1C(=O)N(C)c2nsc(c2C1=O)S(=O)(=O)C
186	PathogenBox_PlateC	C07	13.4487	21.1193	32.4314	32.3549	MMV687254	TUBERCULOSIS		305.374	305.374	C19H19N3O			4.0734	CCCCc1ccc(nc1)C(=O)Nc2nccc3ccccc23
187	PathogenBox_PlateC	C08	92.0016	13.0581	125.675	60.9173	MMV688509	TOXOPLASMOSIS		455.523	455.523	C28H26N3O2F			5.7056	Fc1ccc(cc1)-c1[nH]c(cc1-c1ccncc1)C1CCN(CC1)C(=O)OCc1ccccc1
188	PathogenBox_PlateC	C09	88.8191	24.8778	102.714	19.0965	MMV688361	KINETOPLASTIDS		357.408	357.408	C21H19N5O			2.3121	C1CN=C(N1)c2ccc(cc2)c3cc(on3)c4cccc(c4)C5=NCCN5
189	PathogenBox_PlateC	C10	118.016	47.1367	103.07	15.6352	MMV689029	KINETOPLASTIDS		490.574	490.574	C26H26N4O4S			2.9261	O=C(N1CCN(CC2=CC=C(NS(=O)(C3=CC=C(OC)C=C3)=O)C=C2)CC1)C4=CC(C#N)=CC=C4
190	PathogenBox_PlateC	C11	137.897	107.562	90.3336	13.844	MMV022236	MALARIA		439.482	439.482	C21H28N5O2F3			3.0775	CCN(CC)CCCN1CCN(CC1)C(=O)c2cccc(c2)c3noc(n3)C(F)(F)F
191	PathogenBox_PlateC	D02	84.4789	15.6085	84.7948	4.16412	MMV688410	KINETOPLASTIDS		384.902	384.902	C21H25N4OCl			2.3892	CN(C)CC(=O)NCCN1C(c2ccccc2)c3cc(Cl)ccc3N=C1C
192	PathogenBox_PlateC	D03	20.8459	36.0207	26.1878	39.8461	MMV676048	KINETOPLASTIDS		325.233	325.233	C16H18N2OCl2			4.0023	Clc1ccc(Cl)c(CO[C@H]2CCCC[C@@H]2n3ccnc3)c1
193	PathogenBox_PlateC	D04	58.2235	19.3218	84.4334	7.03481	MMV687703	TUBERCULOSIS		377.483	377.483	C22H27N5O			2.9035	COc1cccc(n1)c2nc3c(cccc3n2CC4CCCN4)N5CCCC5
194	PathogenBox_PlateC	D05	110.829	66.8426	91.8277	11.3196	MMV687248	TUBERCULOSIS		320.32	320.32	C18H13N4OF			3.1061	Nc1nc2ccc(cc2[nH]1)c3cncc(Oc4ccc(F)cc4)c3
195	PathogenBox_PlateC	D06	94.1176	33.9631	88.028	15.2525	MMV688125	TUBERCULOSIS		427.603	427.603	C24H33N3O2S			3.5983	CCCc1ccc(cc1)S(=O)(=O)Nc2ccc(CN3CCN(CC4CC4)CC3)cc2
196	PathogenBox_PlateC	D07	67.6404	16.2815	89.8564	9.2827	MMV687188	TUBERCULOSIS		352.384	352.384	C20H20N2O4			2.9559	COc1ccc2nc(C)cc(OCC(=O)Nc3ccccc3OC)c2c1
197	PathogenBox_PlateC	D08	76.6494	17.8719	84.6687	9.13757	MMV690103	KINETOPLASTIDS		349.43	349.43	C19H23N7			2.6268	C[C@@H](N(C)c1ncc2c(N)nc(N)nc2n1)c3ccc4CCCCc4c3
198	PathogenBox_PlateC	D09	73.1561	8.12423	95.7361	11.766	MMV688124	TUBERCULOSIS		443.645	443.645	C25H37N3O2S			4.2968	CCc1ccc(cc1)S(=O)(=O)Nc2cc(CN3CCN(CCC(C)C)CC3)ccc2C
199	PathogenBox_PlateC	D10	85.8233	15.7978	92.7119	9.38673	MMV688845	TUBERCULOSIS		435.539	435.539	C24H25N3O3S			3.2276	O=C(Nc1ccccc1N2CCOCC2)[C@@H](Cc3ccccc3)NC(=O)c4cccs4
200	PathogenBox_PlateC	D11	0.617649	1.5049	0	0	MMV1030799	MALARIA		330.391	330.391	C20H18N4O			3.9894	CCCn1c(NC(=O)c2ccc3ccccc3n2)nc4ccccc14
201	PathogenBox_PlateC	E02	77.8766	13.4401	84.2436	5.98769	MMV675994	CRYPTOSPORIDIOSIS		336.775	336.775	C18H13N4OCl			2.7981	Clc1ccc(cc1)n2cc(COc3ccnc4ccccc34)nn2
202	PathogenBox_PlateC	E03	28.7173	42.4325	89.6138	5.782	MMV676057	KINETOPLASTIDS		420.504	420.504	C24H28N4O3			4.2349	CC(C)(C)OC(=O)N1CCN(CC1)c2cc(n[nH]2)c3ccc(Oc4ccccc4)cc3
203	PathogenBox_PlateC	E04	60.6226	19.7819	84.6455	3.76564	MMV687699	TUBERCULOSIS		388.171	388.171	C16H10N3OCl2F3			3.6273	FC(F)(F)c1nc2ccccn2c1C(=O)NCc3cc(Cl)cc(Cl)c3
204	PathogenBox_PlateC	E05	90.0759	32.1602	90.51	13.4602	MMV687146	TUBERCULOSIS		298.423	298.423	C19H26N2O			4.8488	Cc1cc(C)c2cc([nH]c2c1)C(=O)NC3CCCCCCC3
205	PathogenBox_PlateC	E06	111.478	65.1649	89.8939	15.2264	MMV687696	TUBERCULOSIS		557.006	557.006	C29H28N4O2ClF3			6.6089	CCc1nc2ccc(Cl)cn2c1C(=O)NCc3ccc(cc3)N4CCC(CC4)c5ccc(OC(F)(F)F)cc5
206	PathogenBox_PlateC	E07	101.982	41.5715	88.5492	12.5558	MMV687170	TUBERCULOSIS		340.764	340.764	C17H13N4O2Cl			3.2232	COc1ccc(Cn2cnc3c(nc(Cl)nc23)c4occc4)cc1
207	PathogenBox_PlateC	E08	83.9081	75.1591	104.174	31.5997	MMV690102	KINETOPLASTIDS		417.46	417.46	C22H23N7O2			2.7956	COc1ccc(Oc2ccc(cc2)[C@@H](C)N(C)c3ncc4c(N)nc(N)nc4n3)cc1
208	PathogenBox_PlateC	E09	104.887	50.2352	89.5614	5.38403	MMV689709	KINETOPLASTIDS		351.402	351.402	C19H21N5O2			1.2126	O=C(N1CC(C2=CC(NC)=CC(C)=N2)OCC1)C3=NNC4=C3C=CC=C4
209	PathogenBox_PlateC	E10	121.91	78.5779	81.0728	5.26982	MMV021375	MALARIA		280.375	280.375	C17H20N4			2.8658	CC(C)CNc1cc(nc2c([nH]nc12)-c1ccccc1)C
210	PathogenBox_PlateC	E11	43.044	37.9168	87.1223	13.159	MMV1029203	MALARIA		375.454	375.454	C20H17N5OS			2.6062	CNC(=O)CNc1nc(nc2scc(c3ccccc3)c12)c4ccccn4
211	PathogenBox_PlateC	F02	108.115	45.5229	82.7912	6.62074	MMV676053	CRYPTOSPORIDIOSIS		357.791	357.791	C18H16N3O3Cl			2.8599	COc1cc(NC(=O)CC2=NN(C)C(=O)c3ccccc23)ccc1Cl
212	PathogenBox_PlateC	F03	23.2421	34.3922	22.1588	36.9014	MMV688179	KINETOPLASTIDS		476.185	403.265	C18H16N6OCl2	Hydrochloride	2	2.8711	NC(=N)Nc1ccc(c(Cl)c1)c2oc(cc2)c3ccc(NC(=N)N)cc3Cl
213	PathogenBox_PlateC	F04	66.3152	21.803	100.482	18.534	MMV023969	TUBERCULOSIS		453.007	416.547	C24H24N4OS	Hydrochloride	1	3.8604	C(Nc1cccnc1)c2ccc(s2)c3cc4ccncc4cc3OC5CCNCC5
214	PathogenBox_PlateC	F05	119.751	58.003	117.69	40.0249	MMV687138	TUBERCULOSIS		339.408	339.408	C19H17NO3S			3.5455	NC(=O)c1cc(ccc1OCCOc2ccccc2)c3ccsc3
215	PathogenBox_PlateC	F06	114.431	61.0258	91.7351	9.45751	MMV688262	TUBERCULOSIS	Delamanid	534.484	534.484	C25H25N4O6F3			5.0428	CC1(COc2ccc(cc2)N3CCC(CC3)Oc4ccc(OC(F)(F)F)cc4)Cn5cc(nc5O1)N(=O)=O
216	PathogenBox_PlateC	F07	75.4516	9.67628	91.673	10.6278	MMV687189	TUBERCULOSIS		336.384	336.384	C20H20N2O3			2.7353	COc1ccc2nc(C)cc(OCC(=O)NCc3ccccc3)c2c1
217	PathogenBox_PlateC	F08	6.43702	11.1493	0	0	MMV687807	TUBERCULOSIS		383.673	383.673	C15H8NO2ClF6			4.764	Oc1ccc(Cl)cc1C(=O)Nc2ccc(c(c2)C(F)(F)F)C(F)(F)F
218	PathogenBox_PlateC	F09	100.211	40.6036	119.605	18.2021	MMV676478	TUBERCULOSIS		435.585	435.585	C24H29N5OS			4.4242	O=C(C1CCN(CC1)c2nnc(s2)n3cccc3)N4CCC(Cc5ccccc5)CC4
219	PathogenBox_PlateC	F10	0.0723626	0.125336	0.964124	1.66991	MMV062221	MALARIA		279.347	279.347	C16H17N5			2.978	Cc1cc(C)nc(n1)n2nc(C)cc2Nc3ccccc3
220	PathogenBox_PlateC	F11	74.7991	13.2728	93.0233	20.3259	MMV688921	DENGUE		451.859	451.859	C23H18N3O5Cl			3.2418	OC[C@H]1O[C@H](C(O)[C@H]1O)n2c3ccc(Cl)cc3c4c(ncnc24)c5oc6ccccc6c5
221	PathogenBox_PlateC	G02	63.9846	21.9946	87.033	4.26153	MMV676191	CRYPTOSPORIDIOSIS		244.286	244.286	C15H16O3			2.946	CC(C)C(Oc1cccc2ccccc12)C(=O)O
222	PathogenBox_PlateC	G03	120.931	73.5271	111.791	25.5116	MMV675993	CRYPTOSPORIDIOSIS		313.354	313.354	C16H19N5O2			1.7862	COc1ccc(cc1OC)c2nn(C(C)C)c3ncnc(N)c23
223	PathogenBox_PlateC	G04	74.4414	13.0579	147.631	68.5211	MMV021660	TUBERCULOSIS		425.9	380.883	C20H21N6Cl	Formate	1	4.0588	Cc1cc(NCCc2ccccc2)nc(NC(=N)Nc3ccc(Cl)cc3)n1
224	PathogenBox_PlateC	G05	74.1895	5.86117	112.129	45.1069	MMV688417	TOXOPLASMOSIS		326.784	326.784	C16H15N6Cl			2.6626	CC(C)n1nc(-c2cc3c(Cl)cccc3[nH]2)c2c(N)ncnc12
225	PathogenBox_PlateC	G06	-0.0282452	0.0489222	0.0686735	0.118946	MMV687273	TUBERCULOSIS		330.551	330.551	C22H38N2			4.9188	CC(=CCC\C(=C/CNCCNC1C2CC3CC(CC1C3)C2)\C)C
226	PathogenBox_PlateC	G07	75.3949	5.31954	92.3302	12.0023	MMV687180	TUBERCULOSIS		458.476	458.476	C24H25N4O2F3			4.0237	CCc1ccc(cc1)[C@@H]2C[C@@H](n3ncc(C(=O)NCc4ccc(OC)cc4)c3N2)C(F)(F)F
227	PathogenBox_PlateC	G08	19.4355	33.6726	25.7194	44.5473	MMV1088520	MALARIA		327.45	327.45	C18H21N3OS			2.852	CC(C)N(Cc1ccccn1)Cc2csc(n2)c3oc(C)cc3
228	PathogenBox_PlateC	G09	115.493	51.7983	115.651	26.5015	MMV688891	TUBERCULOSIS		442.183	442.183	C18H11NO4BrF3			3.8272	COc1cc(Br)cc2C=C(C(=O)Nc3cccc(c3)C(F)(F)F)C(=O)Oc12
229	PathogenBox_PlateC	G10	74.0178	15.0867	90.8028	5.37486	MMV023370	MALARIA		311.736	311.736	C14H10N7Cl			1.0162	Nc1ncc(cc1c2nc3cc(Cl)cnc3[nH]2)c4cn[nH]c4
230	PathogenBox_PlateC	G11	164.981	144.228	100.824	13.0871	MMV688703	TOXOPLASMOSIS		335.418	335.418	C21H22N3F			4.0276	CN1CCC(CC1)c1cc(c([nH]1)-c1ccc(F)cc1)-c1ccncc1
231	PathogenBox_PlateC	H02	78.1127	19.3751	104.322	7.9034	MMV675969	ONCHOCERCIASIS		340.459	340.459	C21H28N2O2			4.235	CC(C)(C)c1ccc(N[C@@H]2CCCC[C@H]2NC(=O)c3occc3)cc1
232	PathogenBox_PlateC	H03	67.9835	19.7351	97.1487	15.0382	MMV688313	SCHISTOSOMIASIS		373.448	373.448	C23H23N3O2			4.561	COc1ccc(cc1OC)-c1nnc2ccc(cn12)-c1cccc(c1)C(C)C
233	PathogenBox_PlateC	H04	59.5173	44.8846	106.402	14.9429	MMV687172	TUBERCULOSIS		387.477	387.477	C23H25N5O			3.6328	O=C(C1CCN(CC1)c2cc(ncn2)n3cccc3)N4CCc5ccccc5C4
234	PathogenBox_PlateC	H05	28.5681	46.6352	74.3053	59.0368	MMV688844	TUBERCULOSIS		424.923	424.923	C23H25N4O2Cl			3.826	COc1ccc2nccc(NC(=O)C3CCN(CCc4ccc(Cl)cc4)CC3)c2n1
235	PathogenBox_PlateC	H06	79.0401	11.8887	99.5823	7.29946	MMV1198433	SCHISTOSOMIASIS		339.395	339.395	C19H21N3O3			2.6117	CC(C)c1ccc(NC(=O)COC2=CC(=C(C#N)C(=O)N2C)C)cc1
236	PathogenBox_PlateC	H07	89.8325	7.22124	107.76	31.2822	MMV024311	TUBERCULOSIS		364.318	291.398	C19H21N3	Hydrochloride	2	3.5845	Cc1ccc2[nH]c(C3CCCNC3)c(c4ccncc4)c2c1
237	PathogenBox_PlateC	H08	4.16768	0.941271	12.834	15.6671	MMV1019989	MALARIA		328.464	328.464	C18H28N6			2.3137	CCc1ccc(cc1)C(NCc2nc(N)nc(n2)N(C)C)C(C)C
238	PathogenBox_PlateC	H09	64.5153	33.5079	101.46	8.37498	MMV1037162	MALARIA		355.464	355.464	C18H21N5OS			2.3916	CCNC(=O)C(C)Nc1nc(nc2sc(C)c(C)c12)c3cccnc3
239	PathogenBox_PlateC	H10	57.5749	41.9839	84.662	21.077	MMV689437	KINETOPLASTIDS		364.232	364.232	C15H15N7Cl2			2.682	CC(N(C)c1ncc2c(N)nc(N)nc2n1)c3cc(Cl)cc(Cl)c3
240	PathogenBox_PlateC	H11	124.007	64.704	107.953	22.0744	MMV688955	TOXOPLASMOSIS		334.711	334.711	C15H11N2O5Cl			3.1627	Cc1cc(NC(=O)c2ccc(Oc3ccc(Cl)cc3O)o2)no1
241	PathogenBox_PlateD	A02	69.7836	33.1911	88.011	13.1697	MMV026468	MALARIA		310.784	310.784	C18H15N2OCl			3.857	OCc1ccc(cc1)c2cncc(Nc3cccc(Cl)c3)c2
242	PathogenBox_PlateD	A03	70.1175	26.5559	102.651	28.04	MMV020670	MALARIA		387.443	387.443	C22H21N5O2			2.1488	COc1ccc(cc1)c2cncc3ccc(nc23)C(=O)NCCCn4ccnc4
243	PathogenBox_PlateD	A04	72.4587	24.2863	96.6918	22.5698	MMV023953	MALARIA		400.526	400.526	C25H28N4O			4.409	O=C(Nc1cccc(c1)c2ccc(NCCCN3CCCC3)nc2)c4ccccc4
244	PathogenBox_PlateD	A05	70.7049	21.8431	105.746	34.2857	MMV010576	MALARIA		370.427	370.427	C19H18N2O4S			2.2375	COc1cc(ccc1O)c2cc(cnc2N)c3ccc(cc3)S(=O)(=O)C
245	PathogenBox_PlateD	A06	72.5469	22.1651	90.3743	19.6003	MMV032967	MALARIA		369.35	369.35	C19H14N5F3			3.1652	FC(F)(F)c1cccc(c1)c2nc3c(NCc4ccncc4)nccc3[nH]2
246	PathogenBox_PlateD	A07	77.3832	9.03471	95.4893	23.3965	MMV031011	MALARIA		436.987	436.987	C25H29N4OCl			3.5802	CNC(=O)C1Cc2c([nH]c3cc(Cl)ccc23)C4(CCN(CCc5ccccc5)CC4)N1
247	PathogenBox_PlateD	A08	83.6681	19.753	108.654	24.0772	MMV688178	SCHISTOSOMIASIS		363.411	363.411	C24H17N3O			4.5932	O(c1ccccc1)c1ccc(cc1)-c1cncc(n1)-c1ccc2[nH]ccc2c1
248	PathogenBox_PlateD	A09	83.2223	16.5806	106.037	34.5179	MMV688362	KINETOPLASTIDS		360.409	360.409	C21H20N4O2			2.5332	COc1cc(cc2cc(oc12)c3ccc(cc3)C4=NCCN4)C5=NCCN5
249	PathogenBox_PlateD	A10	67.599	27.7099	105.746	35.2459	MMV687706	KINETOPLASTIDS		356.848	320.388	C19H20N4O	Hydrochloride	1	2.5759	C1CN(CCN1)c2cc(n[nH]2)c3ccc(Oc4ccccc4)cc3
250	PathogenBox_PlateD	A11	85.7304	25.6898	108.769	24.3767	MMV026356	MALARIA		397.483	397.483	C20H27N7O2			-0.0134	CCn1ncc2c(NC3CCOCC3)c(CNC(=O)c4ccnn4C)c(C)nc12
251	PathogenBox_PlateD	B02	67.3349	22.3364	98.6292	35.341	MMV011511	MALARIA		367.537	367.537	C23H33N3O			3.1917	COc1ccc(CCN2CCC(CC2)NCc3cccc(c3)N(C)C)cc1
252	PathogenBox_PlateD	B03	65.5665	18.9068	95.315	24.3936	MMV007625	MALARIA		409.556	409.556	C22H27N5OS			2.2917	Cc1cc(C)n(n1)c2ccc(NC(=O)C3CCN(Cc4cnc(C)s4)CC3)cc2
253	PathogenBox_PlateD	B04	65.4112	25.2662	90.0001	27.8784	MMV007471	MALARIA		424.884	424.884	C23H21N2O4Cl			3.8619	COc1cc(OC)cc(c1)C(=O)NCC2Cc3cc(Cl)cc(c3O2)c4ccncc4
254	PathogenBox_PlateD	B05	67.9391	21.8796	95.9274	30.3838	MMV024829	MALARIA		380.536	380.536	C23H32N4O			3.978	CC(C)CN1CCC(CC1)N(C)c2cc(NC(=O)c3cccc(C)c3)ccn2
255	PathogenBox_PlateD	B06	61.7109	32.1857	81.1694	21.0293	MMV045105	KINETOPLASTIDS		321.38	321.38	C19H19N3O2			2.7194	C1CN(CCO1)c2cc(n[nH]2)c3ccc(Oc4ccccc4)cc3
256	PathogenBox_PlateD	B07	70.3182	11.0434	94.8657	28.3219	MMV022029	MALARIA		449.617	449.617	C26H31N3O2S			3.7198	CN1CCC(CC1)NCc2cccc(c2)c3ccc(cc3)S(=O)(=O)NCc4ccccc4
257	PathogenBox_PlateD	B08	69.0428	13.2554	86.5731	25.9274	MMV676064	ONCHOCERCIASIS		376.423	376.423	C23H21N2O2F			4.6054	CC(=O)N(CCN(C(=O)c1ccc(F)cc1)c2ccccc2)c3ccccc3
258	PathogenBox_PlateD	B09	76.6208	7.17654	94.767	29.1111	MMV688180	KINETOPLASTIDS		495.425	495.425	C21H24N6O2Cl2S			2.564	Cc1nn(C)c(C)c1NS(=O)(=O)c2c(Cl)cc(cc2Cl)c3ccnc(c3)N4CCNCC4
259	PathogenBox_PlateD	B10	72.2647	8.41997	85.8216	20.1785	MMV024035	MALARIA		502.462	429.542	C25H23N3O2S	Hydrochloride	2	4.9437	O=C(Nc1ccccc1)c2ccc(s2)c3cc4ccncc4cc3OC5CCNCC5
260	PathogenBox_PlateD	B11	83.9059	5.48281	81.9561	15.5508	MMV688941	TUBERCULOSIS		349.423	349.423	C22H23NO3			3.8993	COc1cc(CN2CCC3(CC2)C=Cc4ccccc34)cc5OCOc15
261	PathogenBox_PlateD	C02	63.3993	26.5677	84.7776	23.5506	MMV020291	MALARIA		407.577	407.577	C21H33N3O3S			2.8942	CC(N1CCN(CC1)S(=O)(=O)c2ccc(cc2)C(C)(C)C)C(=O)N3CCCC3
262	PathogenBox_PlateD	C03	63.6129	18.0992	87.7396	22.1024	MMV006833	MALARIA		414.952	414.952	C19H27N2O4ClS			3.0437	Cc1cc(Cl)c(cc1OCC(=O)NC2CCCCC2)S(=O)(=O)N3CCCC3
263	PathogenBox_PlateD	C04	59.6975	22.7225	88.2379	19.7994	MMV026490	MALARIA		372.472	372.472	C23H24N4O			3.3268	O=C(NCCc1ccccc1)c2cc(cnc2NCC3CC3)c4cccnc4
264	PathogenBox_PlateD	C05	63.0034	22.9954	103.242	41.6085	MMV687246	MALARIA		499.587	499.587	C26H25N7O2S			3.296	CN1CCN(CC1)S(=O)(=O)c2ccc(cc2)c3ccc4c(Nc5ccc6nn[nH]c6c5)ccnc4c3
265	PathogenBox_PlateD	C06	68.2926	5.72294	68.422	14.0299	MMV676162	KINETOPLASTIDS		358.347	358.347	C21H14N2O4			3.947	OC(=O)c1cccc2oc(nc12)c3ccccc3NC(=O)c4ccccc4
266	PathogenBox_PlateD	C07	61.5018	15.3048	95.1773	31.478	MMV024114	MALARIA		443.328	443.328	C19H15N4O2BrS			2.6337	Cc1ccc(cc1)S(=O)(=O)n2cc(c3ccnc(N)c3)c4cc(Br)cnc24
267	PathogenBox_PlateD	C08	69.8128	27.1597	86.5737	25.2647	MMV688467	KINETOPLASTIDS		410.532	410.532	C22H26N4O2S			4.1565	CCCCN(CCCC)c1c(cc(cc1C#N)S(=O)(=O)Nc2ccccc2)C#N
268	PathogenBox_PlateD	C09	75.6627	2.9106	104.847	42.4815	MMV675998	KINETOPLASTIDS		408.283	335.363	C17H17N7O	Hydrochloride	2	-0.4692	COc1ccc(cc1c2cn(nn2)c3ccc(cc3)C(=N)N)C(=N)N
269	PathogenBox_PlateD	C10	9.8907	16.903	1.92175	3.32857	MMV659010	KINETOPLASTIDS		344.34	344.34	C18H15N4F3			3.5784	FC(F)(F)c1cc(NCCc2ccccc2)nc(n1)c3ccccn3
270	PathogenBox_PlateD	C11	11.1179	6.89245	61.4495	26.0555	MMV676008	KINETOPLASTIDS		441.392	441.392	C24H15N3O6			3.8158	OC(=O)c1cccc2oc(nc12)c3cccc(O)c3NC(=O)c4cc(on4)c5ccccc5
271	PathogenBox_PlateD	D02	63.4017	26.5202	85.4578	23.35	MMV676269	MALARIA		356.434	356.434	C21H25N2O2F			3.054	C[C@@H](N1CCCC[C@H]1c2ccc(OCc3cccc(F)c3)cc2)C(=O)N
272	PathogenBox_PlateD	D03	65.2454	15.081	104.485	51.5058	MMV020081	MALARIA		381.451	381.451	C22H24N3O2F			3.944	COc1cccc(CC(=O)N2CCC(CC2)n3c(C)nc4ccc(F)cc34)c1
273	PathogenBox_PlateD	D04	49.6211	43.4541	46.0894	39.3314	MMV026550	MALARIA		321.424	321.424	C20H23N3O			3.0768	CC(C)(C)CN1C(=NC(C1=O)(c2ccccc2)c3ccccc3)N
274	PathogenBox_PlateD	D05	62.5842	12.2742	112.227	54.1397	MMV675995	ONCHOCERCIASIS		284.353	284.353	C17H20N2O2			2.8419	COc1ccc(cc1)N(CCc2cccc(C)n2)C(=O)C
275	PathogenBox_PlateD	D06	62.998	17.8489	53.5294	38.6949	MMV688274	KINETOPLASTIDS		521.971	521.971	C27H25N5O3ClF			4.3162	Fc1cccc(COc2ccc(Nc3ncnc4ccc(NC(=O)CN5CCOCC5)cc34)cc2Cl)c1
276	PathogenBox_PlateD	D07	71.6089	6.35518	99.1768	33.8266	MMV023860	MALARIA		370.431	370.431	C18H18N4O3S			1.5408	NS(=O)(=O)c1cccc(c1)c2ccc3ncc(nc3c2)N4CCOCC4
277	PathogenBox_PlateD	D08	72.9745	4.14208	82.8871	22.9811	MMV688407	KINETOPLASTIDS		387.438	387.438	C21H21N7O			0.896	COc1cc(ccc1c2cn(nn2)c3cccc(c3)C4=NCCN4)C5=NCCN5
278	PathogenBox_PlateD	D09	91.6027	33.4689	93.063	32.0315	MMV023949	MALARIA		429.528	429.528	C24H27N7O			2.2874	CC(C)(C)c1cc(C(=O)N2CCN(CC2)c3nccnc3C#N)n(Cc4ccccc4)n1
279	PathogenBox_PlateD	D10	65.7204	20.2266	91.3037	29.0982	MMV676050	CRYPTOSPORIDIOSIS		450.557	450.557	C23H26N6O2S			2.661	CS(=O)(=O)N1CCC(Cn2nc(Cc3cccc4ccccc34)c5c(N)ncnc25)CC1
280	PathogenBox_PlateD	D11	20.3841	11.6901	62.0364	35.997	MMV024406	MALARIA		428.323	428.323	C21H19N5OCl2			3.6423	Clc1cccc(NC(=O)c2cnc(N3CCN(CC3)c4ccncc4)c(Cl)c2)c1
281	PathogenBox_PlateD	E02	61.4405	20.1689	85.7887	24.6222	MMV023233	MALARIA		260.3	260.3	C16H12N4			2.1289	Nc1nccc2ccc(cc12)c3ccc4nccn4c3
282	PathogenBox_PlateD	E03	61.5041	9.9523	87.9113	22.6571	MMV085230	MALARIA		316.401	316.401	C18H24N2O3			2.9678	CCCNC(=O)N1CCC2(CC1)CC(=O)c3cc(C)ccc3O2
283	PathogenBox_PlateD	E04	64.2694	14.749	87.2196	25.739	MMV085071	MALARIA		348.41	348.41	C19H20N6O			0.9612	COc1cncc(c1)c2cncc(n2)N3CCN(CC3)c4ccncc4
284	PathogenBox_PlateD	E05	-0.157538	0.272864	0.93341	1.61671	MMV659004	KINETOPLASTIDS		364.88	364.88	C21H21N4Cl			4.387	Cc1nc(nc(N2CCC(Cc3ccccc3)C2)c1Cl)c4ccccn4
285	PathogenBox_PlateD	E06	68.8314	13.0188	82.2146	20.9716	MMV676260	MALARIA		329.347	329.347	C17H17N5F2			2.2327	CN1CCN(CC1)c2nccc3nc([nH]c23)c4ccc(F)c(F)c4
286	PathogenBox_PlateD	E07	74.1288	6.79144	88.1983	27.2691	MMV688364	TOXOPLASMOSIS		459.543	459.543	C25H29N7O2			3.4504	CC(C)(C)OC(=O)N1CCC(Cn2nc(-c3cnc4ccccc4c3)c3c(N)ncnc23)CC1
287	PathogenBox_PlateD	E08	75.4236	7.2762	84.3148	26.0377	MMV032995	MALARIA		400.199	400.199	C17H13NO2BrF3			3.2553	FC(F)(F)c1ccc(CN2C(=O)COCc3ccc(Br)cc23)cc1
288	PathogenBox_PlateD	E09	91.0317	27.76	98.8722	31.7735	MMV688279	KINETOPLASTIDS		397.941	397.941	C23H28N3OCl			4.6649	CC1=Nc2ccc(Cl)cc2C(O)(N1CCN3CCCCC3)c4ccc(C)cc4
289	PathogenBox_PlateD	E10	53.1465	26.9513	27.6936	28.6924	MMV688271	KINETOPLASTIDS		476.185	403.265	C18H16N6OCl2	Hydrochloride	2	2.6504	NC(=N)Nc1ccc(cc1Cl)c2oc(cc2)c3ccc(N=C(N)N)c(Cl)c3
290	PathogenBox_PlateD	E11	71.5831	8.77825	88.0818	24.2613	MMV019790	MALARIA		372.428	372.428	C22H20N4O2			3.4924	CCOc1ccccc1C(=O)Nc2cccc(c2)c3nc4ncccn4c3C
291	PathogenBox_PlateD	F02	62.3986	20.9	86.8895	27.8536	MMV009135	MALARIA		388.475	388.475	C22H24N6O			2.4878	O=C(C1CCN(CC1)c2nnnn2c3ccccc3)N4CCc5ccccc5C4
292	PathogenBox_PlateD	F03	67.2464	19.5064	94.8375	27.1197	MMV011765	MALARIA		358.729	358.729	C13H6N4OClF3S			3.0978	FC(F)(F)c1cnc(Sc2oc(nn2)c3ccncc3)c(Cl)c1
293	PathogenBox_PlateD	F04	63.6464	17.8077	93.6957	20.2872	MMV024937	MALARIA		453.851	417.391	C20H18N5O2F3	Hydrochloride	1	2.8548	FC(F)(F)c1nc(oc1C(=O)Nc2ccc(nc2)N3CCNCC3)c4ccccc4
294	PathogenBox_PlateD	F05	73.1409	4.33558	113.564	45.7657	MMV085499	MALARIA		315.336	315.336	C18H13N5O			1.7552	NC(=O)c1ccc(cc1)c2nc(cnc2N)c3ccc(cc3)C#N
295	PathogenBox_PlateD	F06	77.6961	7.53827	48.7812	39.9258	MMV023985	MALARIA		324.384	324.384	C18H20N4O2			2.0149	COc1ccc(cc1OC)c2cnc3ccc(nn23)N4CCCC4
296	PathogenBox_PlateD	F07	72.131	3.46166	92.9047	30.7888	MMV024195	MALARIA		424.571	424.571	C22H28N6OS			2.9135	CN(C)CCNC(=O)N1CCCN(CC1)c2ncnc3cc(sc23)c4ccccc4
297	PathogenBox_PlateD	F08	67.181	2.88504	77.8375	25.9157	MMV676063	ONCHOCERCIASIS		489.624	489.624	C30H36N3O2F			7.1155	CCCCc1ccc(NC(=O)Nc2ccc(O[C@H]3CCCC[C@@H]3N(C)c4ccccc4)c(F)c2)cc1
298	PathogenBox_PlateD	F09	66.038	17.9607	102.458	24.6115	MMV676186	KINETOPLASTIDS		469.446	469.446	C26H19N3O6			4.5194	COC(=O)c1cccc2oc(nc12)c3cccc(OC)c3NC(=O)c4cc(on4)c5ccccc5
299	PathogenBox_PlateD	F10	63.3559	23.1183	99.7072	39.8327	MMV688474	KINETOPLASTIDS		477.472	387.438	C21H21N7O	Formate	2	0.896	COc1cc(ccc1n2cc(nn2)c3cccc(c3)C4=NCCN4)C5=NCCN5
300	PathogenBox_PlateD	F11	97.1634	9.37327	113.608	42.9669	MMV687812	TUBERCULOSIS		534.509	534.509	C24H26N8O2F4			2.3491	CN1CCN(CCCOc2ncc(Nc3ncc(nc3C(=O)N)c4ccc(c(F)c4)C(F)(F)F)cn2)CC1
301	PathogenBox_PlateD	G02	65.7851	23.7248	83.1793	20.766	MMV007803	MALARIA		321.826	321.826	C16H16NO2ClS			3.415	Clc1ccccc1CSCc2oc(cc2)C(=O)NC3CC3
302	PathogenBox_PlateD	G03	82.3984	27.3208	99.2452	18.5978	MMV001059	MALARIA		379.441	379.441	C17H24NO3F3S			3.5317	CCCS(=O)(=O)N1CCC(CO)(Cc2ccccc2C(F)(F)F)CC1
303	PathogenBox_PlateD	G04	71.3401	25.2078	97.5644	32.902	MMV011691	MALARIA		391.431	391.431	C21H21N5O3			2.4348	NCC(=O)N1CCn2c(C1)nc(c2Nc3ccc4OCOc4c3)c5ccccc5
304	PathogenBox_PlateD	G05	66.9674	23.607	146.542	53.0662	MMV676877	MALARIA		315.794	315.794	C18H18NO2Cl			3.3259	OCCNc1ccc(cc1)C(=O)C2C[C@H]2c3ccc(Cl)cc3
305	PathogenBox_PlateD	G06	76.7043	5.7734	96.6429	38.3651	MMV663250	MALARIA		366.896	366.896	C21H23N4Cl			3.1529	Clc1cccc(c1)C(c2ccc(CN3CCNCC3)cc2)n4ccnc4
306	PathogenBox_PlateD	G07	72.9418	11.2741	122.345	66.911	MMV407539	WOLBACHIA LF		448.545	448.545	C24H24N4O3S			3.9164	CCc1nc2ccc(cn2c1N(C)Cc3cccs3)C(=O)NCc4ccc5OCOc5c4
307	PathogenBox_PlateD	G08	83.6513	5.53529	99.7009	36.5082	MMV688372	KINETOPLASTIDS		401.436	401.436	C23H20N5OF			4.4344	FC1=C(C=C(NC(=O)N2CCCC2)C=C1)C1=NC2=CC(=CN=C2N1)C1=CC=CC=C1
308	PathogenBox_PlateD	G09	73.3396	10.617	131.007	60.4233	MMV658993	KINETOPLASTIDS		402.904	402.904	C19H19N4O2ClS			2.682	Cc1nc(nc(NCCc2ccc(cc2)S(=O)(=O)C)c1Cl)c3ccccn3
309	PathogenBox_PlateD	G10	75.0156	5.40218	105.313	43.8537	MMV676182	CRYPTOSPORIDIOSIS		372.466	372.466	C22H24N6			2.7895	Nc1ncnc2c1c(Cc3cccc4ccccc34)nn2CC5CCNCC5
310	PathogenBox_PlateD	G11	2.34909	2.44474	2.6658	2.76417	MMV676411	TUBERCULOSIS		325.385	325.385	C17H15N3O2S			3.2069	CC(Oc1ccccc1)C(=O)Nc2nc(cs2)c3ccccn3
311	PathogenBox_PlateD	H02	71.6008	30.3823	104.567	27.0395	MMV007133	MALARIA		413.496	413.496	C21H23N3O4S			3.369	CC(C)N(Cc1ccccc1)S(=O)(=O)c2ccc(cc2)C(=O)Nc3cc(C)on3
312	PathogenBox_PlateD	H03	75.2307	22.3267	98.8762	26.9485	MMV022478	MALARIA		545.93	432.915	C23H21N6OCl	Trifluoroacetate	1	2.5545	Clc1cccc(c1)c2cnn3ccc(nc23)C(=O)Nc4ccc(cc4)N5CCNCC5
313	PathogenBox_PlateD	H04	77.6488	22.7427	101.849	32.627	MMV024101	MALARIA		461.756	352.376	C16H12N6O2S	Hydrochloride	3	0.1633	NS(=O)(=O)c1cncc(c1)c2ccc3nccc(c4cn[nH]c4)c3n2
314	PathogenBox_PlateD	H05	75.2799	23.8273	116.245	29.5787	MMV676881	MALARIA		300.266	300.266	C14H10N6F2			2.1762	CCn1cnc2c(Nc3cc(F)cc(F)c3)nc(nc12)C#N
315	PathogenBox_PlateD	H06	72.2314	27.131	101.55	29.2308	MMV024443	MALARIA		328.375	328.375	C20H16N4O			3.2459	CN(C(=O)c1cc2c(cccc2[nH]1)c3cncnc3)c4ccccc4
316	PathogenBox_PlateD	H07	66.1167	19.59	104.362	35.0854	MMV688469	TOXOPLASMOSIS		275.308	275.308	C16H13N5			2.3282	Nc1ncnc2[nH]nc(Cc3cccc4ccccc34)c12
317	PathogenBox_PlateD	H08	81.5471	24.5966	105.806	30.1684	MMV023388	MALARIA		385.389	385.389	C21H18N3OF3			3.917	FC(F)(F)c1cccc(c1)C(=O)NC2CCN(C2)c3ccnc4ccccc34
318	PathogenBox_PlateD	H09	2.33779	1.33756	4.05253	6.25678	MMV675968	CRYPTOSPORIDIOSIS		359.81	359.81	C17H18N5O2Cl			2.3107	COc1ccc(OC)c(NCc2ccc3nc(N)nc(N)c3c2Cl)c1
319	PathogenBox_PlateD	H10	104.785	27.8346	114.738	36.95	MMV675996	ONCHOCERCIASIS		352.47	352.47	C22H28N2O2			4.186	COc1ccc(cc1)N(CCc2cccc(C)n2)C(=O)C3CCCCC3
320	PathogenBox_PlateD	H11	74.8427	63.3444	110.425	23.2223	MMV688980	MALARIA		335.396	335.396	C16H18N3O2FS			2.2828	CCC1=CC(=O)N(C)C(=N1)SC(C)C(=O)Nc2ccc(F)cc2
321	PathogenBox_PlateE	A02	97.6471	40.935	112.784	11.9921	MMV011229	MALARIA		292.26	292.26	C14H11N4F3			2.9885	CC1=NC2=NC=CN2C(NC3=CC=C(C(F)(F)F)C=C3)=C1
322	PathogenBox_PlateE	A03	23.2383	35.83	58.7731	39.0183	MMV676468	TUBERCULOSIS		335.442	335.442	C10H8NOCl5			3.6765	NC(CC(=O)c1ccc(Cl)cc1Cl)C(Cl)(Cl)Cl
323	PathogenBox_PlateE	A04	80.8956	23.2503	104.501	8.26264	MMV688771	SCHISTOSOMIASIS		325.428	325.428	C18H19N3OS			4.7276	Cc1ccccc1C(=O)N2N=C(Nc3ccccc3)SC2(C)C
324	PathogenBox_PlateE	A05	1.54986	1.74355	1.92513	0.632506	MMV687798	REFERENCE COMPOUNDS	Levofloxacin (-)-ofloxacin	361.368	361.368	C18H20N3O4F			-0.3426	C[C@H]1COc2c(N3CCN(C)CC3)c(F)cc4C(=O)C(=CN1c24)C(=O)O
325	PathogenBox_PlateE	A06	1.06608	0.939445	4.4077	2.21745	MMV688775	REFERENCE COMPOUNDS	Rifampicin	822.94	822.94	C43H58N4O12			1.2905	CO[C@H]1\C=C\O[C@@]2(C)OC3=C(C2=O)C4=C(O)\C(=C/NN5CCN(C)CC5)\C(=N\C(=O)\C(=C/C=C\[C@H](C)[C@H](O)[C@@H](C)[C@@H](O)[C@@H](C)[C@H](OC(=O)C)[C@@H]1C)\C)\C(=C4C(=C3C)O)O
326	PathogenBox_PlateE	A07	95.8808	17.8583	97.4425	3.93005	MMV676159	KINETOPLASTIDS		339.819	339.819	C19H18N3OCl			3.7112	Clc1cccc(CO[C@H]2CCc3ccccc3[C@@H]2n4ccnn4)c1
327	PathogenBox_PlateE	A08	96.008	26.2345	97.3549	6.11106	MMV393144	MALARIA		310.376	310.376	C18H19N4F			2.6789	CN1CCN(CC1)c2nccc3[nH]c(cc23)c4cccc(F)c4
328	PathogenBox_PlateE	A09	92.5614	16.7245	104.973	4.4448	MMV007920	MALARIA		329.352	329.352	C20H15N3O2			3.7846	Nc1ccc(cc1)C(=O)Nc2ccc(cc2)c3oc4ccccc4n3
329	PathogenBox_PlateE	A10	25.7356	44.6101	58.9639	50.3566	MMV688270	SCHISTOSOMIASIS		359.421	359.421	C22H21N3O2			3.7272	COc1ccc(cc1)-c1cnc2cnc(cn12)-c1cccc(OC(C)C)c1
330	PathogenBox_PlateE	A11	103.251	31.8418	116.447	19.6052	MMV019993	MALARIA		362.359	362.359	C17H17N6F3			2.0475	CC(Nc1nncc(n1)c2ccc(cc2)C(F)(F)F)c3cn(C)nc3C
331	PathogenBox_PlateE	B02	82.2118	20.0996	94.1417	1.97805	MMV687794	MALARIA		384.291	384.291	C15H18N3O2BrS			2.2604	CC1(C)Cc2c(CO1)c(nc3snc(Br)c23)N4CCOCC4
332	PathogenBox_PlateE	B03	94.2937	16.2007	96.3471	4.6157	MMV676470	TUBERCULOSIS		299.364	299.364	C18H21NO3			3.4061	CCOc1ccc(OCC(=O)Nc2cc(C)cc(C)c2)cc1
333	PathogenBox_PlateE	B04	29.4935	51.0842	97.3403	4.58896	MMV688938	TUBERCULOSIS		356.457	356.457	C20H21N2OFS			4.0104	CCOc1ccc(cc1)c2nc(CNCCc3ccc(F)cc3)cs2
334	PathogenBox_PlateE	B05	92.3444	14.3359	97.1613	8.62912	MMV689000	REFERENCE COMPOUNDS	Amphotericin B	924.079	924.079	C47H73NO17			0.323	C[C@@H]1OC(=O)C[C@H](O)C[C@H](O)CC[C@@H](O)[C@H](O)C[C@H](O)C[C@]2(O)C[C@H](O)[C@H]([C@H](C[C@@H](O[C@@H]3O[C@H](C)[C@@H](O)[C@H](N)[C@@H]3O)\C=C\C=C\C=C\C=C\C=C\C=C\C=C\[C@H](C)[C@@H](O)[C@H]1C)O2)C(=O)O
335	PathogenBox_PlateE	B06	85.4	13.8798	91.8747	4.13156	MMV004168	KINETOPLASTIDS		314.86	314.86	C19H23N2Cl			4.0247	CN1CCCN(CC1)C(c2ccccc2)c3ccc(Cl)cc3
336	PathogenBox_PlateE	B07	95.6937	14.9755	90.8081	3.88951	MMV676161	KINETOPLASTIDS		335.4	335.4	C20H21N3O2			2.3449	C(N1CCOCC1)c2cc(n[nH]2)c3ccc(Oc4ccccc4)cc3
337	PathogenBox_PlateE	B08	91.8159	5.511	85.0982	15.1108	MMV023183	MALARIA		402.542	402.542	C25H30N4O			2.6132	C(C1CC1)N2Cc3ccccc3OC4(CCN(Cc5c[nH]c6cnccc56)CC4)C2
338	PathogenBox_PlateE	B09	95.8431	24.1409	101.027	4.24014	MMV047015	TUBERCULOSIS		256.227	256.227	C12H11N2OF3			2.4745	COc1cc(nc2ccc(C)c(N)c12)C(F)(F)F
339	PathogenBox_PlateE	B10	94.9877	23.4071	97.3366	2.14563	MMV688795	KINETOPLASTIDS		297.395	297.395	C18H23N3O			2.0697	O=C(NCCc1ccn(n1)c2ccccc2)C3CCCCC3
340	PathogenBox_PlateE	B11	112.223	20.7789	94.8811	4.56764	MMV688352	DENGUE		525.001	525.001	C29H25N6O2Cl			4.176	Clc1ccc(cc1)[C@@H]2[C@H](Oc3ccccc3)C(=O)N2CCn4cnc5c(NCc6ccccc6)ncnc45
341	PathogenBox_PlateE	C02	77.0872	18.7543	90.6097	1.91081	MMV676398	WOLBACHIA LF		360.427	360.427	C18H20N2O4S			2.8153	CCS(=O)(=O)N(Cc1occc1)Cc2cc3ccc(C)cc3nc2O
342	PathogenBox_PlateE	C03	118.518	44.9306	98.8692	8.29252	MMV676472	TUBERCULOSIS		424.9	424.9	C22H17N2O3ClS			5.1053	COc1cccc(OC)c1C(=O)Nc2ccc(Cl)c(c2)c3nc4ccccc4s3
343	PathogenBox_PlateE	C04	88.9023	18.0268	96.2569	3.20419	MMV671636	ONCHOCERCIASIS		447.359	447.359	C23H14NO3F5			5.4793	CC1=C(C(=O)c2c(F)cc(F)cc2N1)c3ccc(Oc4ccc(OC(F)(F)F)cc4)cc3
344	PathogenBox_PlateE	C05	87.7004	15.7629	90.1111	3.12671	MMV676599	CRYPTOSPORIDIOSIS		331.414	331.414	C20H21N5			3.3637	CC(C)(C)n1nc(Cc2cccc3ccccc23)c4c(N)ncnc14
345	PathogenBox_PlateE	C06	75.6313	12.3819	88.9924	10.336	MMV689244	KINETOPLASTIDS		459.891	459.891	C24H21N3OClF3			4.9176	FC(F)(F)c1ccc(cc1)N2CCN(CC2)C(=O)[C@@H](c3ccc(Cl)cc3)c4cccnc4
346	PathogenBox_PlateE	C07	102.054	20.2334	94.8627	5.39711	MMV688411	TOXOPLASMOSIS		359.428	359.428	C20H21N7			1.7914	Nc1ncnc2n(CC3CCNCC3)nc(-c3cnc4ccccc4c3)c12
347	PathogenBox_PlateE	C08	108.84	28.8196	98.9307	9.06422	MMV687765	TUBERCULOSIS		462.974	426.514	C25H26N6O	Hydrochloride	1	3.4715	Cc1cnc(nc1Oc2ccc(cc2)n3ccnc3)N4CCN[C@@H](Cc5ccccc5)C4
348	PathogenBox_PlateE	C09	124.745	64.626	103.665	4.7496	MMV020165	MALARIA		379.382	379.382	C19H20N3O2F3			3.1517	CC(C)NCC(=O)Nc1cccc(c1)C(=O)Nc2cccc(c2)C(F)(F)F
349	PathogenBox_PlateE	C10	101.14	40.3961	94.5831	4.44054	MMV676524	TUBERCULOSIS		219.67	219.67	C11H10N3Cl			2.4692	Nc1cccnc1Nc2ccc(Cl)cc2
350	PathogenBox_PlateE	C11	0.154319	0.267288	34.0861	45.6588	MMV611037	TUBERCULOSIS		334.42	334.42	C14H14N4O2S2			3.3215	CCC(Sc1oc2ccccc2n1)C(=O)Nc3nnc(C)s3
351	PathogenBox_PlateE	D02	19.4044	33.6093	26.0733	45.1602	MMV688766	SCHISTOSOMIASIS		369.722	369.722	C17H11NO3ClF3			4.5719	COc1ccc(c(O)c1)c2onc(c2c3ccc(Cl)cc3)C(F)(F)F
352	PathogenBox_PlateE	D03	92.495	15.0027	120	24.6323	MMV200748	TUBERCULOSIS		374.283	374.283	C19H20NO2Br			4.2677	COc1ccc(cc1)C2(CCCC2)C(=O)Nc3ccc(Br)cc3
353	PathogenBox_PlateE	D04	79.2776	14.5371	93.0479	6.56769	MMV667494	MALARIA		494.03	494.03	C25H34N5OClF2			4.3904	FC1(F)CCN(CCCCNc2cc(c3cc(ccc3n2)Cl)C(=O)NCCN2CCCC2)CC1
354	PathogenBox_PlateE	D05	88.4548	13.4342	92.8866	6.59254	MMV028694	MALARIA		332.367	332.367	C18H16N6O			2.1153	OCCc1ccc(Nc2nccc(n2)c3nnc4ccccn34)cc1
355	PathogenBox_PlateE	D06	85.0751	15.8999	85.8823	6.64182	MMV001499	REFERENCE COMPOUNDS	Nifurtimox	287.294	287.294	C10H13N3O5S			-0.2513	CC1CS(=O)(=O)CCN1\N=C\c2oc(cc2)[N+](=O)[O-]
356	PathogenBox_PlateE	D07	87.7796	9.85547	94.5385	3.07895	MMV688345	TOXOPLASMOSIS		311.405	311.405	C16H17N5S			1.7171	Nc1nc(N)c2c3CCN(Cc4ccccc4)Cc3sc2n1
357	PathogenBox_PlateE	D08	89.1906	15.1148	85.1158	6.32517	MMV010545	MALARIA		410.456	410.456	C19H18N6O3S			0.7735	COc1ccc(cn1)c2cnc3ccc(NCc4ccc(cc4)S(=O)(=O)N)nn23
358	PathogenBox_PlateE	D09	12.0262	5.51976	60.0935	35.6887	MMV023227	MALARIA		277.371	277.371	C18H19N3			3.3237	Cc1nc([nH]c1C)c2cccc(NCc3ccccc3)c2
359	PathogenBox_PlateE	D10	78.6311	9.81545	97.4323	8.24862	MMV687700	TUBERCULOSIS		584.505	466.425	C17H18N6O8S	Acetate	2	-0.8449	Nc1ncnc2c1ncn2[C@@H]3O[C@H](COS(=O)(=O)NC(=O)c4ccccc4O)[C@@H](O)[C@H]3O
360	PathogenBox_PlateE	D11	98.7269	24.581	113.158	29.8981	MMV676384	TUBERCULOSIS		307.322	307.322	C18H14N3OF			3.712	Fc1ccccc1c2oc(NCCc3ccccc3)c(n2)C#N
361	PathogenBox_PlateE	E02	75.6325	20.3871	206.734	201.14	MMV020289	MALARIA		361.459	361.459	C18H23N3O3S			3.117	Cc1ccc(NC(=O)c2cc(ccc2C)S(=O)(=O)NC(C)(C)C)nc1
362	PathogenBox_PlateE	E03	91.1065	16.7139	92.6445	6.89066	MMV002816	REFERENCE COMPOUNDS	Diethylcarbamazine	199.298	199.298	C10H21N3O			0.8076	CCN(CC)C(=O)N1CCN(C)CC1
363	PathogenBox_PlateE	E04	83.1449	10.6966	95.1876	4.73367	MMV634140	MALARIA		431.968	431.968	C22H30N5O2Cl			2.1784	Clc1ccc2nc(cc(c2c1)C(=O)NCCN1CCCC1)NCCN1CCOCC1
364	PathogenBox_PlateE	E05	79.1631	19.7059	90.936	6.50932	MMV030734	MALARIA		584.864	358.833	C17H19N6OCl	Trifluoroacetate	2	1.9474	CC(C)(CN)c1nc(c2ccc(Cl)c(O)c2)c([nH]1)c3ccnc(N)n3
365	PathogenBox_PlateE	E06	61.4103	11.5822	67.8678	12.6191	MMV689243	KINETOPLASTIDS		466.422	466.422	C23H20N4F6			4.2575	FC(F)(F)c1ccc(cc1)N(C2CCN(CC2)c3ccc(cn3)C(F)(F)F)c4cccnc4
366	PathogenBox_PlateE	E07	100.037	9.7779	92.1642	8.14338	MMV676358	MALARIA		324.564	324.564	C11H7N5BrCl			2.1886	Nc1ncc(Br)cc1c2nc3cc(Cl)cnc3[nH]2
367	PathogenBox_PlateE	E08	13.4582	23.2463	3.8782	0.803588	MMV687729	TUBERCULOSIS		400.418	400.418	C22H22N2O3F2			2.6774	OC[C@H]1CN(C(=O)O1)c2cc(F)c(C3=CCN(Cc4ccccc4)CC3)c(F)c2
368	PathogenBox_PlateE	E09	109.157	30.6287	114.586	20.0739	MMV407834	MALARIA		437.462	437.462	C22H26N3O3F3			3.3119	CCOc1ccccc1NC(C)C(=O)Nc2cc(ccc2N3CCOCC3)C(F)(F)F
369	PathogenBox_PlateE	E10	-0.108073	0.187188	2.61973	3.66033	MMV687813	TUBERCULOSIS		467.465	467.465	C25H23N3O4F2			3.3845	Fc1cc(cc(F)c1C2=CCN(Cc3ccccc3)CC2)N4C[C@H](COc5ccon5)OC4=O
370	PathogenBox_PlateE	E11	83.2173	22.5434	91.875	5.9693	MMV153413	TUBERCULOSIS		422.328	422.328	C16H11N2O4F5S			3.1178	CCOC(=O)c1c(C)c(sc1NC(=O)c2c(F)c(F)c(F)c(F)c2F)C(=O)N
371	PathogenBox_PlateE	F02	78.0518	17.4951	91.9599	4.6886	MMV019551	MALARIA		354.4	354.4	C20H22N2O4			2.9614	CCC(NC(=O)c1ccccc1NC(=O)c2ccc(C)cc2)C(=O)OC
372	PathogenBox_PlateE	F03	-0.121901	0.211139	25.4395	39.5811	MMV688552	SCHISTOSOMIASIS		393.386	393.386	C17H14N5OF3S			3.4154	CC(C(SC1=NC=CC=N1)=C2C)=NN2C(NC3=CC=CC(C(F)(F)F)=C3)=O
373	PathogenBox_PlateE	F04	69.6729	1.34846	99.0583	10.8528	MMV016838	MALARIA		418.299	418.299	C22H16N3OBr			4.9415	Cc1ccc(cc1)-c1cc(c2cc(ccc2n1)Br)C(=O)Nc1cccnc1
374	PathogenBox_PlateE	F05	89.7174	15.2727	124.697	34.5429	MMV676270	MALARIA		356.434	356.434	C21H25N2O2F			3.054	C[C@@H](N1CCCC[C@@H]1c2ccc(OCc3cccc(F)c3)cc2)C(=O)N
375	PathogenBox_PlateE	F06	90.0077	12.9911	110.342	13.3352	MMV688755	TUBERCULOSIS		359.257	359.257	C14H12N3O5F3			2.811	[O-][N+](=O)c1cn2C[C@@H](COc2n1)OCc3ccc(OC(F)(F)F)cc3
376	PathogenBox_PlateE	F07	86.5712	15.3743	98.2333	23.8423	MMV228911	TUBERCULOSIS		393.465	393.465	C21H19N3O3S			3.7547	COc1cccc(NC(=O)c2c3CCCc3sc2NC(=O)c4cccnc4)c1
377	PathogenBox_PlateE	F08	67.1151	23.3103	88.069	9.83413	MMV272144	TUBERCULOSIS		254.268	254.268	C9H10N4O3S			-0.2677	COc1cccc(c1)n2nnnc2S(=O)(=O)C
378	PathogenBox_PlateE	F09	84.2252	8.69014	97.4104	6.99301	MMV026313	MALARIA		237.262	237.262	C14H11N3O			1.9219	Nc1nccc2ccc(Oc3ccncc3)cc12
379	PathogenBox_PlateE	F10	95.4071	17.3997	87.765	9.94668	MMV161996	TUBERCULOSIS		408.948	408.948	C20H25N2O3ClS			4.4139	CC(C)CNS(=O)(=O)c1ccc(CCC(=O)Nc2ccc(Cl)cc2C)cc1
380	PathogenBox_PlateE	F11	130.268	56.2473	122.404	27.222	MMV688543	DENGUE		442.632	442.632	C24H46N2O5			2.5494	CC(C)(C)C(=O)N(CCCCCCN1C[C@H](O)[C@@H](O)[C@H](O)[C@H]1CO)C2CCCCCC2
381	PathogenBox_PlateE	G02	78.1114	25.1211	104.562	26.5837	MMV146306	TUBERCULOSIS		364.489	364.489	C23H28N2O2			4.2713	CCC(C)NC(=O)c1ccc(NC(=O)C2(CCCC2)c3ccccc3)cc1
382	PathogenBox_PlateE	G03	90.1932	40.7562	110.729	29.6559	MMV688557	TUBERCULOSIS		303.827	267.367	C12H13NO2S2	Hydrochloride	1	1.5596	NCC(c1cccs1)S(=O)(=O)c2ccccc2
383	PathogenBox_PlateE	G04	0.494416	1.16299	7.50899	11.9995	MMV021013	TUBERCULOSIS		294.402	294.402	C18H22N4			3.5484	C1CCC(CC1)Nc2cc(nc(n2)c3ccccn3)C4CC4
384	PathogenBox_PlateE	G05	83.8617	23.0966	226.252	226.838	MMV392832	MALARIA		316.364	316.364	C19H16N4O			3.2592	COc1cccc(c1)c2cc3c(Nc4cccnc4)nccc3[nH]2
385	PathogenBox_PlateE	G06	82.0479	16.0849	101.737	17.2464	MMV688754	KINETOPLASTIDS	Trifloxystrobin	408.371	408.371	C20H19N2O4F3			4.4694	CO\N=C(/C(=O)OC)\c1ccccc1CO\N=C(/C)\c2cccc(c2)C(F)(F)F
386	PathogenBox_PlateE	G07	98.4731	39.1366	103.729	3.97304	MMV001561	KINETOPLASTIDS	Fluoxetine	309.331	309.331	C17H18NOF3			3.6241	CNCCC(Oc1ccc(cc1)C(F)(F)F)c2ccccc2
387	PathogenBox_PlateE	G08	-0.0636226	0.110198	9.52964	8.37333	MMV658988	KINETOPLASTIDS		338.842	338.842	C19H19N4Cl			3.9294	CN(CCc1ccccc1)c2nc(nc(C)c2Cl)c3ccccn3
388	PathogenBox_PlateE	G09	105.76	27.7877	110.266	2.39632	MMV084864	MALARIA		316.324	316.324	C17H12N6O			2.0217	O=C(Nc1cnc2ccccc2c1)c3cccc(c3)n4cnnn4
389	PathogenBox_PlateE	G10	79.5023	9.18809	106.902	10.089	MMV676492	LYMPHATIC FILARIASIS		350.642	350.642	C9H5N3OBrClS2			3.417	Sc1nnc(NC(=O)c2cc(Br)ccc2Cl)s1
390	PathogenBox_PlateE	G11	124.032	49.5464	108.49	2.89867	MMV688415	KINETOPLASTIDS		433.543	433.543	C26H31N3O3			2.7144	CO[C@@H]1CN(C[C@H]1O)c2ccc(C#CC3(O)CN4CCC3CC4)c(Cc5ccccc5)n2
391	PathogenBox_PlateE	H02	95.744	30.2498	141.764	57.9351	MMV688330	TOXOPLASMOSIS		346.808	346.808	C18H19N2O3Cl			3.1506	CC(=O)N1CCN(CC1)c1ccc(Oc2ccc(Cl)cc2O)cc1
392	PathogenBox_PlateE	H03	87.481	37.6073	103.603	4.78203	MMV687796	REFERENCE COMPOUNDS	Amikacin	781.763	585.603	C22H43N5O13	Sulfuric Acid	2	-8.5032	NCCC(O)C(=O)N[C@@H]1C[C@H](N)[C@@H](OC2O[C@H](CN)[C@@H](O)[C@H](O)[C@H]2O)[C@H](O)C1OC3O[C@H](CO)[C@@H](O)[C@H](N)[C@H]3O
393	PathogenBox_PlateE	H04	62.9293	23.2738	89.9727	35.0209	MMV688939	TUBERCULOSIS		302.373	302.373	C19H18N4			2.6049	Cc1ccc2nc(C)c(c3ccn(Cc4ccccc4)n3)n2c1
394	PathogenBox_PlateE	H05	1.50576	1.75636	4.64605	3.02256	MMV688978	REFERENCE COMPOUNDS	Auranofin	678.484	678.484	C20H34AuO9PS			1.4	CCP(=[Au]S[C@H]1O[C@@H](COC(=O)C)[C@H](OC(=O)C)[C@@H](OC(=O)C)[C@@H]1OC(=O)C)(CC)CC
395	PathogenBox_PlateE	H06	112.504	40.0731	116.613	7.12617	MMV688990	REFERENCE COMPOUNDS	Miltefosine	407.568	407.568	C21H46NO4P			0.1224	CCCCCCCCCCCCCCCCOP(=O)([O-])OCC[N+](C)(C)C
396	PathogenBox_PlateE	H07	81.2037	18.2456	110.762	9.45095	MMV688273	KINETOPLASTIDS		394.829	394.829	C21H16N4OClF			4.6727	Nc1ccc2ncnc(Nc3ccc(OCc4cccc(F)c4)c(Cl)c3)c2c1
397	PathogenBox_PlateE	H08	2.2756	2.31286	18.2092	21.3482	MMV393995	TUBERCULOSIS		204.233	204.233	C10H12N4O			1.1019	Cc1cc(O)nc(n1)n2nc(C)cc2C
398	PathogenBox_PlateE	H09	113.455	32.0255	107.371	2.40247	MMV1236379	KINETOPLASTIDS		232.239	232.239	C12H12N2O3			1.7765	CCOC(=O)c1noc(N)c1c2ccccc2
399	PathogenBox_PlateE	H10	100.858	13.4848	109.247	4.84471	MMV688550	KINETOPLASTIDS		437.492	437.492	C23H27N5O4			2.6626	CCc1ccccc1n2c(C)cn3c4C(=O)N(C(C(C)C)C(=O)OC)C(=O)N(C)c4nc23
400	PathogenBox_PlateE	H11	1.61375	1.39919	19.7226	27.5385	MMV495543	TUBERCULOSIS		276.358	276.358	C14H16N2O2S			3.7508	CC(C)(C)c1cnc(NC(=O)c2ccccc2O)s1
